# Supplementary material for: Effect of stress management based on cognitive–behavioural therapy on nurses as a universal prevention in the workplace: a systematic review and meta-analysis protocol
Source: PubMed Central journal article supplement — BMJ Open. 2022 Sep 19;12(9):e062516. doi: 10.1136/bmjopen-2022-062516 (PMC9486364; doi:10.1136/bmjopen-2022-062516), 2022-09-19
Supplement: bmjopen-2022-062516.draft_revisions.pdf [file bmjopen-2022-062516.draft_revisions.pdf]

# BMJ Open

BMJ Open is committed to open peer review. As part of this commitment we make the peer review history of every article we publish publicly available.

When an article is published we post the peer reviewers' comments and the authors' responses online. We also post the versions of the paper that were used during peer review. These are the versions that the peer review comments apply to.

The versions of the paper that follow are the versions that were submitted during the peer review process. They are not the versions of record or the final published versions. They should not be cited or distributed as the published version of this manuscript.

BMJ Open is an open access journal and the full, final, typeset and author-corrected version of record of the manuscript is available on our site with no access controls, subscription charges or pay-per-view fees (<http://bmjopen.bmj.com>).

If you have any questions on BMJ Open's open peer review process please email [info.bmjopen@bmj.com](mailto:info.bmjopen@bmj.com)

# BMJ Open

## The effect of stress management based on cognitive behavioral therapy on nurses as a universal prevention in the workplace: a systematic review and meta-analysis protocol

|                               |                                                                                                                                                                                                                                                                                                                                                                                                                                                                                                                                                                                                                  |
|-------------------------------|------------------------------------------------------------------------------------------------------------------------------------------------------------------------------------------------------------------------------------------------------------------------------------------------------------------------------------------------------------------------------------------------------------------------------------------------------------------------------------------------------------------------------------------------------------------------------------------------------------------|
| Journal:                      | <i>BMJ Open</i>                                                                                                                                                                                                                                                                                                                                                                                                                                                                                                                                                                                                  |
| Manuscript ID                 | bmjopen-2022-062516                                                                                                                                                                                                                                                                                                                                                                                                                                                                                                                                                                                              |
| Article Type:                 | Protocol                                                                                                                                                                                                                                                                                                                                                                                                                                                                                                                                                                                                         |
| Date Submitted by the Author: | 02-Mar-2022                                                                                                                                                                                                                                                                                                                                                                                                                                                                                                                                                                                                      |
| Complete List of Authors:     | Kuribayashi, Kazuto; Tokyo Medical and Dental University Graduate School of Health Care Sciences, Department of Mental Health and Psychiatric Nursing<br>Takano, Ayumi; Tokyo Medical and Dental University Graduate School of Health Care Sciences, Department of Mental Health and Psychiatric Nursing<br>Inagaki, Akiko; Tokyo Healthcare University, Faculty of Healthcare, Division of Nursing<br>Imamura, Kotaro; The University of Tokyo, Graduate School of Medicine, Department of Mental Health<br>Kawakami, Norito; The University of Tokyo, Graduate School of Medicine, Department of Mental Health |
| Keywords:                     | MENTAL HEALTH, OCCUPATIONAL & INDUSTRIAL MEDICINE, Depression & mood disorders < PSYCHIATRY                                                                                                                                                                                                                                                                                                                                                                                                                                                                                                                      |
|                               |                                                                                                                                                                                                                                                                                                                                                                                                                                                                                                                                                                                                                  |

SCHOLARONE™  
Manuscripts

1  
2  
3  
4  
5  
6 1 March 1, 2022

7 2

8  
9 3 The effect of stress management based on cognitive behavioral therapy on nurses as a universal  
10 4 prevention in the workplace: a systematic review and meta-analysis protocol

11 5

12 6

13 7 Authors

14 8 Kazuto Kuribayashi<sup>1</sup>

15 9 E-mail: [kkuribayashi-jans@umin.ac.jp](mailto:kkuribayashi-jans@umin.ac.jp)

16 10 Ayumi Takano<sup>1</sup>

17 11 E-mail: [ayumi-takano@umin.ac.jp](mailto:ayumi-takano@umin.ac.jp)

18 12 Akiko Inagaki<sup>2</sup>

19 13 [akikok-tyk@umin.ac.jp](mailto:akikok-tyk@umin.ac.jp)

20 14 Kotaro Imamura<sup>3</sup>

21 15 E-mail: [kouima-tyk@umin.ac.jp](mailto:kouima-tyk@umin.ac.jp)

22 16 Norito Kawakami<sup>3</sup>

23 17 E-mail: [norito@m.u-tokyo.ac.jp](mailto:norito@m.u-tokyo.ac.jp)

24 18

25 19 Correspondence to: Kazuto Kuribayashi

26 20 Department of Mental Health and Psychiatric Nursing, Graduate School of Health Care Sciences,

27 21 Tokyo Medical and Dental University,

28 22 1-5-45 Yushima, Bunkyo-ku, Tokyo 113-8510, JAPAN

29 23 Tel: +81-3-5803-5336

30 24 E-mail: [kkuribayashi-jans@umin.ac.jp](mailto:kkuribayashi-jans@umin.ac.jp)

31 25

32 26

33 27 Authors' information

34 28 <sup>1</sup>Department of Mental Health and Psychiatric Nursing, Graduate School of Health Care Sciences,

35 29 Tokyo Medical and Dental University, 1-5-45 Yushima, Bunkyo-ku, Tokyo 113-8510, Japan.

36 30 <sup>2</sup>Division of Nursing, Faculty of Healthcare, Tokyo Healthcare University, 4-1-17 Higashigotanda,

37 31 Shinagawa-ku, Tokyo 141-8648, Japan.

38 32 <sup>3</sup>Department of Mental Health, Graduate School of Medicine, The University of Tokyo, 7-3-1 Hongo,

39 33 Bunkyo-ku, Tokyo 113-0033, Japan.

40 34

41 35 **Keywords:** Nurse, Cognitive behavioral therapy, Universal prevention, Systematic review, Meta-  
42 36 analysis

1  
2  
3  
4  
5  
6  
7  
8  
9  
10  
11  
12  
13  
14  
15  
16  
17  
18  
19  
20  
21  
22  
23  
24  
25  
26  
27  
28  
29  
30  
31  
32  
33  
34  
35  
36  
37  
38  
39  
40  
41  
42  
43  
44  
45  
46  
47  
48  
49  
50  
51  
52  
53  
54  
55  
56  
57  
58  
59  
60

1  
2 **Word count: 2,752**

For peer review only

## 1 **ABSTRACT**

### 2 **Introduction**

3 The mental health status of nurses affects not only their well-being but also the organizational  
4 outcomes and the quality of patient care. Hence, stress management strategies are critical as a universal  
5 prevention measure to maintain nurses' mental health in the workplace. No systematic review or meta-  
6 analysis has been conducted to evaluate the effect of cognitive behavioral therapy (CBT) that  
7 specifically focuses on universal prevention. Therefore, the aim of this study is to examine the  
8 effectiveness that is reported in published randomized controlled trial (RCT) studies.

### 9 **Methods and analysis**

10 This systematic review and meta-analysis will analyze published studies selected from electronic  
11 databases (i.e., [Cochrane Central Register of Controlled Trials](#), PubMed, CINAHL, PsycINFO,  
12 PsycARTICLES, Web of Science, and the Japan Medical Abstracts Society). The inclusion criteria  
13 for studies are that they (1) were conducted to assess the effect of CBT on the mental health of nurses  
14 as a universal prevention, (2) used an RCT design, (3) provided sufficient results (sample sizes, means,  
15 and standard deviations) to estimate the pooled effect sizes with 95% confidence intervals, and (4)  
16 were published as original articles and written in English or Japanese. Studies will be excluded if they  
17 only targeted nurses who had been screened as being at high risk in terms of their mental health and  
18 indicated that they required the prevention. The study selection, data collection, quality assessment,  
19 and statistical syntheses will be conducted based on discussions among the authors.

### 20 **Ethics and dissemination**

21 Ethical approval is not required because this study is based on information obtained from previous  
22 studies. The results and findings of this study will be submitted for publication in a peer-reviewed  
23 international scientific journal. Results from this study will be helpful when implementing CBT  
24 strategies for nurses as a universal preventative measure in the workplace and for managing stress-  
25 related outcomes.

### 27 **Strengths and limitations of this study**

28 ► This systematic review and meta-analysis will offer the strongest evidence about the effectiveness  
29 of CBT-based interventions on the mental health of nurses that can be applied as a universal prevention  
30 in the workplace.

31 ► This study will not include RCT studies that targeted only nurses who were screened as being high  
32 risk in terms of their mental health.

33 ► The findings from the study will be useful for conducting CBT-based stress management  
34 interventions for nurses in the workplace as a universal prevention and managing stress-related  
35 outcomes.

36 ► This study is limited because the findings cannot be generalized to countries or groups that are not

- 1
- 2
- 3
- 4
- 5
- 6 1 included in the selected studies.
- 7 2
- 8 3 PROSPERO registration number CRD42020152837.
- 9 4
- 10
- 11
- 12
- 13
- 14
- 15
- 16
- 17
- 18
- 19
- 20
- 21
- 22
- 23
- 24
- 25
- 26
- 27
- 28
- 29
- 30
- 31
- 32
- 33
- 34
- 35
- 36
- 37
- 38
- 39
- 40
- 41
- 42
- 43
- 44
- 45
- 46
- 47
- 48
- 49
- 50
- 51
- 52
- 53
- 54
- 55
- 56
- 57
- 58
- 59
- 60

For peer review only

## 1 INTRODUCTION

2 Studies of stress in nursing workplaces have reported that nurses have a high prevalence of probable  
3 occupational stress.[1, 2] The main causes of the work-related stress among nurses are heavy  
4 workloads, interpersonal conflicts, the emotional impacts of care, lack of reward or control, and shift  
5 work.[3] Occupational stress is known to be a major risk factor for burnout, anxiety, and depression.[3]  
6 These mental health problems can lead to the worsening of the nurses' somatic symptoms[4] and the  
7 degradation of their quality of life[5] and their work engagement,[6] and it can have negative effects  
8 in the workplace (e.g., an increase in absenteeism[7] and the intention to leave employment[7]) and  
9 lead to a deterioration in the quality of care that the nurses provide.[8] As in nursing workplaces, there  
10 are seldom Employee Assistance Programs (EAP) that provide any formal stress management  
11 initiatives for employees to improve their mental health by learning coping mechanisms, due to lack  
12 of manpower, resources, and managers' awareness,[9] nurses can be vulnerable to depression due to  
13 the lack of stress management skills.[10] According to two surveys in the U.S., the prevalence of  
14 depression in nurses varies from 18% to 35%, which is higher than in the general population.[4, 5]  
15 Maintaining and improving nurses' mental health as a primary prevention is necessary not only for  
16 their well-being but also for improving their productivity, reducing the cost to their workplace, and  
17 guaranteeing the quality of care for the patients.[11] Therefore, stress management for nurses is needed  
18 in nursing workplaces.

19 Cognitive behavioral therapy (CBT) is one of the major stress management techniques for workers  
20 and it has been shown to have positive effects as a primary prevention. According to a meta-review[12]  
21 and several meta-analyses,[13, 14] it has been proved that CBT, as a stress management technique,  
22 significantly improves occupational stress, anxiety, and depression for workers in the workplace.  
23 These meta-analyses concluded that CBT was more effective than other interventions.[13, 14] In  
24 addition, in studies targeting nurses, a Cochrane review showed that CBT stress management  
25 interventions had significant positive effects on stress-related outcomes, including occupational stress  
26 and depressive symptoms, among nurses (standardized mean difference [SMD] = -0.34 at the six-  
27 month follow-up).[10] Thus, evidence about CBT-based stress management for nurses has  
28 accumulated.

29 Primary prevention strategies for mental health problems can be classified into three categories; 1)  
30 universal prevention which targets the general population and are not directed at a specific risk group,  
31 2) selective prevention which targets individuals considered to be at potentially risk for mental illness  
32 as based on the presence of an identified risk factor such as parental mental illness, and 3) indicated  
33 prevention which targets individuals who are screened for already having early signs or symptoms of  
34 mental illness.[15–17] There are theoretical and practical reasons why universal prevention can be  
35 more appropriate for the workplace.[18] As universal prevention can reach more individuals, including

1 selected and indicated groups without the need for screening which is a costly process to  
2 implement,[15, 18, 19] and can reach individuals who might not want to seek treatment or disclose  
3 symptoms for fear of its perceived negative effects on work, the universal prevention of the nurses'  
4 mental health problems is a high-priority strategy for mental health management in nursing workplaces.  
5 Therefore, systematic reviews and meta-analyses are necessary to obtain a comprehensive  
6 understanding and conduct evidence-based interventions regarding the effect of CBT on nurses'  
7 mental health as a universal prevention in the workplace.

8 However, there has been no systematic review and/or meta-analysis that has specialized in the  
9 universal prevention effect of CBT on nurses' mental health. The abovementioned Cochrane review  
10 of stress management for nurses included studies of indicated prevention, which targeted only nurses  
11 at high risk who were sorted using a screening scale of mental health.[10] Other systematic reviews,  
12 as well, included studies that were not randomized or only for nurses who were screened as high-risk  
13 for their mental health.[1, 20–22] Therefore, the effect of CBT-based stress management interventions  
14 for universal prevention among nurses has not been clearly identified in a systematic review and/or a  
15 meta-analysis. Further, various provisional methods and formats have been developed for CBT in  
16 recent years as well as conventional face-to-face implementations of CBT. For example, iCBT  
17 (internet-based CBT), in which CBT is provided through an Internet-based platform is attracting  
18 attention, and studies that evaluate its effectiveness and social implementations are underway.  
19 However, the Cochrane review regarding nurse stress management[10] included studies up to 2013  
20 and did not include new methods of implementation such as iCBT.

21 Therefore, the aim of this systematic review and meta-analysis is to evaluate the overall effectiveness  
22 of CBT-based interventions for stress management among nurses, including the recent studies, as a  
23 universal prevention in the workplace. We hypothesize that the CBT-based interventions will be  
24 effective for improving nurses' mental health as a universal prevention.

## 26 **METHODS AND ANALYSIS**

### 27 **Study design**

28 This study protocol for a systematic review and meta-analysis of intervention studies (randomized  
29 controlled trials; RCTs) follows the Preferred Reporting Items for Systematic Reviews and Meta-  
30 Analysis Protocols (PRISMA-P) guideline.[23] Findings will be reported according to the PRISMA  
31 statement.[24] The study protocol was registered with PROSPERO (CRD42020152837).

### 33 **Eligibility criteria**

34 The participants, interventions, comparisons, and outcomes (PICO) of the studies included in this  
35 systematic review and meta-analysis will be defined as follows: (P) healthy nurses (not diagnosed as  
36 having a mental illness), (I) any type or mode of CBT-based intervention, (C) no intervention or not a



1 CBT-based intervention, and (O) mental health. We will include intervention studies (RCTs)  
2 conducted in the entire nurse population. Studies will be excluded if they correspond to selective or  
3 indicated prevention among primary prevention. We will exclude studies in which participants were  
4 practical nurses or nursing aides and those that involved other healthcare workers such as doctors in  
5 this systematic review and meta-analysis. There will be no exclusion criteria regarding participants'  
6 employment status or the healthcare settings in which they were employed. However, we will exclude  
7 studies that targeted individuals considered to be at potentially risk for mental illness according to an  
8 identified risk factor such as parental mental illness, or that exclusively targeted nurses who had been  
9 screened as being high risk in terms of their mental health. We will include studies with a CBT-based  
10 intervention that aimed to reduce burnout, anxiety, or depressive symptoms in the entire nursing  
11 population.

12 CBT is defined as an intervention that provides new ways to rationally think and/or behave in stressful  
13 situations, such as through cognitive restructuring, behavioral activation, problem solving,  
14 [mindfulness-based cognitive therapy \(MBCT\)](#), and acceptance and commitment therapy (ACT).[25,  
15 26] The comparisons will be defined as no intervention; waiting-list control; treatment as usual, such  
16 as education or training (but not CBT) that is provided by the nursing association; or alternative (not  
17 CBT) interventions. Aspects of mental health (i.e., [primary outcome](#)) will include burnout, anxiety, or  
18 depression, which are the adverse effects of occupational stress.[3] These will be assessed using such  
19 self-reported measures as the Maslach Burnout Inventory,[27] the General Health Questionnaire,[28]  
20 and the Beck Depression Inventory,[29] as well as structured interviews, including the Hamilton  
21 Rating Scale for Depression.[30] [As secondary outcomes, we will consider occupational outcomes,  
22 which can be the adverse effects of mental health problems. These will include absenteeism, intention  
23 to leave employment, work performance, or work engagement.](#) Studies that did not conduct a statistical  
24 analysis to examine the intervention effects will be excluded.

25 Studies will be included in this systematic review and meta-analysis that (1) were conducted to  
26 evaluate the effect of CBT-based interventions on the mental health of nurses as a universal prevention,  
27 (2) used an RCT design, (3) did not exclusively target nurses who had been screened as being at high  
28 risk in terms of their mental health, (4) provide sufficient data (sample sizes, means, and standard  
29 deviations [*SDs*]) for calculating the effect sizes with 95% confidence intervals (CIs), (5) were  
30 published as original articles written in English or Japanese, and (6) were published up to [2022](#).

### 31 **Information sources, search strategy, and data management**

32 Systematic searches of published studies will be performed using the following electronic databases:  
33 [Cochrane Central Register of Controlled Trials \(CENTRAL\)](#), PubMed (MEDLINE), CINAHL,  
34 PsycINFO, PsycARTICLES, Web of Science, and the Japan Medical Abstracts Society. The search  
35 terms will include words related to the research PICO. The search strategy (i.e., the key terms) is listed  
36

1 in the online Supplementary File 1. All identified studies will be managed using Microsoft Excel  
2 (Microsoft Corp., Redmond, WA, USA) files. Prior to the study selection process, duplicate citations  
3 in the Excel files will be excluded by KK who is a first author. Decisions about all of the studies will  
4 be recorded.

### 5 6 **Study selection process**

7 The study selection process will include two phases. The first is a sifting phase. According to the  
8 inclusion criteria, three review authors (KK, AT, and AI) will independently conduct the screening of  
9 the studies. The titles and abstracts will be screened according to the eligibility criteria created earlier  
10 in the sifting phase. The second is the full text review phase. The full text of all eligible studies will  
11 be obtained and reviewed using a standardized form (see the online Supplementary File 2) to assess  
12 their eligibility for inclusion in this review. Any discrepancies in the assessment will be recorded, and  
13 if they cannot be resolved, they will be settled by discussion among all of the authors until a consensus  
14 is reached. The reference lists from the studies will be carefully examined for any additional eligible  
15 studies. We will directly contact the corresponding authors of the eligible studies if (1) the results of  
16 the publication are unclear and/or may be related to multiple interpretations, or (2) the reported results  
17 did not show data relevant to our study analysis. A flow chart will be provided to show the entire  
18 review process.

### 19 20 **Data extraction**

21 The data will be independently extracted from the included studies by three review authors (KK, AT,  
22 and AI) using a standardized data extraction form. Any disagreement or inconsistencies will be  
23 recorded and solved by discussion among all of the authors until a consensus is reached. The extracted  
24 data will include the following: the year of publication, country where the study was conducted,  
25 number of participants included in the analysis, sampling framework, participants' demographic  
26 characteristics (i.e., mean age, sex proportions, years of nursing experience, and employment status),  
27 number of participants who were excluded or lost to follow-up, the contents of the intervention  
28 program, control condition (i.e., no intervention, waiting-list control, or other), outcome variables (i.e.,  
29 stress-related outcomes such as burnout, anxiety, and depressive symptoms, or occupational outcomes  
30 such as absenteeism, intention to leave employment, work performance, or work engagement), length  
31 of follow-up, and sufficient data (i.e., the number of participants in each group (N), mean differences  
32 (MD) between groups, and SD for outcomes) for calculating the effect size with 95% CIs for  
33 determining the effect of CBT on the mental health of nurses for universal prevention. This extraction  
34 format is experimental and can be modified as needed. The relevant research teams of the studies will  
35 be contacted about the availability of unpublished or missing data.

## 1 Risk-of-bias assessment

2 Three review authors (KK, AT, and AI) will independently assess the methodological quality of the  
3 included studies using the Cochrane Collaboration's risk-of-bias tool.[31] The tool evaluates possible  
4 sources of bias in intervention studies based on seven main categories: (1) random sequence generation,  
5 (2) allocation concealment, (3) blinding of the participants and personnel, (4) blinding of the outcome  
6 assessment, (5) incomplete outcome data, (6) selective outcome reporting, and (7) other biases.  
7 Inconsistencies in the quality assessment of the methodology will be recorded and discussed by all of  
8 the authors until a consensus is reached. For the assessment of the meta-bias, the publication bias will  
9 be assessed using funnel plots for asymmetry and Egger's test.

10

## 11 Data synthesis and statistical methods

12 The included studies will be statistically synthesized by a meta-analysis to estimate the pooled effect  
13 (SMD) of CBT on the mental health of nurses as a universal prevention in the workplace. We will  
14 combine studies that we determine to be similar in terms of follow-up time. We will consider the  
15 effects over the following follow-up periods: (i) Up to one month, (ii) From one month to six months,  
16 or (iii) Over six months. Forest plots of the between-group and post-intervention effect sizes for mental  
17 health and the 95% CIs will be produced. The number of participants and the scores, such as the means  
18 and *SDs* for the intervention and the control group for the psychological outcomes, will be entered  
19 into Review Manager (RevMan).[32] The magnitude of the effect size will be interpreted as being  
20 small (0.2), medium (0.5), or large (0.8).[33]

21 The meta-analysis will be performed when at least three eligible studies can be collected. If it is not  
22 appropriate to perform a meta-analysis (i.e., no more than two studies are eligible and included), the  
23 results will be presented in a narrative form. The publication bias will be examined using a funnel plot  
24 and Egger's test. Statistical heterogeneity will be assessed using the chi-square ( $\chi^2$ ) test with Cochran's  
25 *Q* statistic and the *I*<sup>2</sup>. [34] The *I*<sup>2</sup> values of 25%, 50%, and 75% indicate low, medium, and high  
26 heterogeneity, respectively.[35] An *I*<sup>2</sup> value of 50% or more will be deemed to indicate considerable  
27 heterogeneity. If there is little or no statistical heterogeneity (i.e., an *I*<sup>2</sup> value of less than 50%) in a  
28 comparison, we will pool the results using a fixed-effects model. If the *I*<sup>2</sup> statistic is more than 50%,  
29 we will use a random-effects model.[36]

30 Since the effect of the CBT may differ according to the specific population, subgroup analyses will be  
31 conducted to compare the results. The major possible grouping characteristics will include newly  
32 graduated nurses (i.e., less than 1 year of nursing experience) because they have been reported to have  
33 higher stress-related outcomes, including depressive symptoms, compared to veteran nurses. [11, 37–  
34 39] We will treat participants with more/less than 1 year of nursing experience as another stratification  
35 factor and conduct a subgroup analysis. In addition, the mode of CBT delivery (e.g., face-to-face vs  
36 computer-based CBT including iCBT) or outcome variables (i.e., burnout, anxiety, and depressive

1 symptoms) will be considered as possible grouping characteristics. Any subgroup differences will be  
2 reported, and our findings will be explained by considering these differences. To assess the effect of  
3 the risk of bias on the pooled results, a sensitivity analysis will be conducted of the included studies  
4 that are only classified as low risk according to the Cochrane Collaboration's risk-of-bias tool.[31] All  
5 of the extracted data and analyzed results will be deposited by the corresponding author and they will  
6 be available for external reviewers and readers upon request.

### 7 8 **Patient and public involvement statement**

9 This study will not involve any patients or participants because this study protocol is for a systematic  
10 review and meta-analysis.

### 11 12 **Ethics and dissemination**

13 As this systematic review and meta-analysis will be based on previously published studies, it does not  
14 require ethical approval. The results and findings of this study will be published in peer-reviewed  
15 international journals and be presented at related research conferences, academic symposiums, and  
16 seminars.

### 17 18 **STRENGTHS AND LIMITATIONS**

19 The greatest strength of this study is that, to the best of our knowledge, it will be the first systematic  
20 review and meta-analysis to offer evidence regarding the effect of CBT-based interventions on the  
21 mental health of nurses as a universal prevention in the workplace. Because the mental health status  
22 of nurses deleteriously affects not only the individuals but also the organizations and the quality of  
23 patient care,[8, 11] if the effect of the CBT provided in the workplace as a universal prevention is  
24 confirmed by this meta-analysis, it will be beneficial for the nurses', occupation's, and patients' health.  
25 The findings from this study will be helpful for conducting CBT-based stress management  
26 interventions for nurses as a universal prevention in the workplace and for managing stress-related  
27 outcomes.

28 However, this study has the limitation that the generalization of our study findings to countries or  
29 groups that are not included in the selected studies will be limited.

### 30 31 **Acknowledgments**

32 We would like to thank Editage [<http://www.editage.com>] for editing and reviewing this manuscript  
33 for English language.

### 34 35 **Author Contributions**

36 The study was conceived and designed by KK, KI, and NK. The initial draft of the manuscript was

1 written by KK, and all authors revised and contributed to the final manuscript. All authors read and  
2 approved the final manuscript. The entire study process (i.e., the data collection, assessment, and  
3 synthesis) will be conducted by all of the authors.

#### 4 **Funding statement**

5 This research received no specific grant from any funding agency in the public, commercial, or not-  
6 for-profit sectors.

#### 7 **Competing interests statement**

8 The authors declare no conflict of interest.

#### 9 **References**

- 10 1. Mimura C, Griffiths P. The effectiveness of current approaches to workplace stress management  
11 in the nursing profession: An evidence based literature review. *Occup Environ Med* 2003;60:10–  
12 5.
- 13 2. Marine A, Ruotsalainen J, Serra C, et al. Preventing occupational stress in healthcare workers.  
14 *Cochrane database Syst Rev* 2006;134:CD002892.
- 15 3. McVicar A. Workplace stress in nursing: A literature review. *J Adv Nurs* 2003;44:633–42.
- 16 4. Welsh D. Predictors of depressive symptoms in female medical-surgical hospital nurses. *Issues*  
17 *Ment Health Nurs* 2009;30:320–6.
- 18 5. Letvak S, Ruhm CJ, McCoy T. Depression in hospital-employed nurses. *Clin Nurse Spec*  
19 2012;26:177–82.
- 20 6. Innstrand ST, Langballe EM, Falkum E. A longitudinal study of the relationship between work  
21 engagement and symptoms of anxiety and depression. *Stress Heal* 2012;28:1–10.
- 22 7. Baba V V, Galperin BL, Lituchy TR. Occupational mental health: A study of work-related  
23 depression among nurses in the Caribbean. *Int J Nurs Stud* 1999;36:163–9.
- 24 8. Letvak S, Ruhm C, Gupta S. Nurses' presenteeism and its effects on self-reported quality of care  
25 and costs. *Am J Nurs* 2012;112:30-8; quiz 48, 39.
- 26 9. Yung PMB, Fung MY, Chan TMF, Lau BWK. Relaxation training methods for nurse managers  
27 in Hong Kong: A controlled study. *Int J Ment Health Nurs* 2004;13:255–61.
- 28 10. Ruotsalainen JH, Verbeek JH, Mariné A, et al. Preventing occupational stress in healthcare  
29 workers. *Cochrane database Syst Rev* 2015;CD002892.
- 30 11. Brandford AA, Reed DB. Depression in Registered Nurses: A State of the Science. *Workplace*  
31 *Health Saf* 2016;64:488–511.
- 32 12. Joyce S, Modini M, Christensen H, et al. Workplace interventions for common mental disorders:  
33 A systematic meta-review. *Psychol Med* 2016;46:683–97.

- 1  
2  
3  
4  
5  
6 1 13. Richardson KM, Rothstein HR. Effects of occupational stress management intervention  
7 2 programs: A meta-analysis. *J Occup Health Psychol* 2008;13:69–93.  
8 3 14. van der Klink JJ, Blonk RW, Schene AH, et al. The benefits of interventions for work-related  
9 4 stress. *Am J Public Health* 2001;91:270–6.  
10 5 15. McLaughlin KA. The Public Health Impact of Major Depression: A Call for Interdisciplinary  
11 6 Prevention Efforts. *Prev Sci* 2011;12:361–71.  
12 7 16. World Health Organization. Prevention of mental disorders: Effective interventions and policy  
13 8 implications. Geneva: WHO, 2004.  
14 9 17. Miller, J. E. Mental illness prevention. Alexandria, VA: American Mental Health Counselors  
15 10 Association, 2014.  
16 11 18. Tan L, Wang MJ, Modini M, et al. Preventing the development of depression at work: A  
17 12 systematic review and meta-analysis of universal interventions in the workplace. *BMC Med*  
18 13 2014;12.  
19 14 19. Lynch FL, Hornbrook M, Clarke GN, et al. Cost-effectiveness of an intervention to prevent  
20 15 depression in at-risk teens. *Arch Gen Psychiatry* 2005;62:1241–8.  
21 16 20. Edwards D, Burnard P. A systematic review of stress and stress management interventions for  
22 17 mental health nurses. *J Adv Nurs* 2003;42:169–200.  
23 18 21. Romppanen J, Häggman-Laitila A. Interventions for nurses' well-being at work: A quantitative  
24 19 systematic review. *J Adv Nurs* 2017;73:1555–69.  
25 20 22. Westermann C, Kozak A, Harling M, et al. Burnout intervention studies for inpatient elderly care  
26 21 nursing staff: Systematic literature review. *Int J Nurs Stud* 2014;51:63–71.  
27 22 23. Moher D, Shamseer L, Clarke M, et al. Preferred reporting items for systematic review and meta-  
28 23 analysis protocols (PRISMA-P) 2015 statement. *Syst Rev* 2015;4:1.  
29 24 24. Moher D, Liberati A, Tetzlaff J, et al. Preferred Reporting Items for Systematic Reviews and  
30 25 Meta-Analyses: The PRISMA Statement. *Ann Intern Med* 2009;151:264–9.  
31 26 25. Hofmann SG, Sawyer AT, Fang A. The empirical status of the “new wave” of CBT. *Psychiatr*  
32 27 *Clin North Am* 2010;33:701–10.  
33 28 26. Beck AT, Dozois DJ. Cognitive therapy: Current status and future directions. *Annu Rev Med*  
34 29 2011;62:397–409.  
35 30 27. Maslach C, Jackson SE, Leiter MP. The Maslach Burnout Inventory Manual. 3rd Edition. Palo  
36 31 Alto, CA: Consulting Psychologists Press 1996.  
37 32 28. Goldberg D, Williams P. A User's Guide to the General Health Questionnaire. London: NFER-  
38 33 Nelson 1991.  
39 34 29. Beck A, Steer R, Brown G. BDI-II, Beck depression inventory: Manual. vi. San Antonio, Tex,  
40 35 Boston: Psychological Corp 1996.  
41 36 30. Cusin C, Yang H, Yeung A, et al. Chapter 2 Rating Scales for Depression. pp.7-35; In: L.Baer,  
42  
43  
44  
45  
46  
47  
48  
49  
50  
51  
52  
53  
54  
55  
56  
57  
58  
59  
60



1  
2  
3  
4  
5  
6  
7  
8  
9  
10  
11  
12  
13  
14  
15  
16  
17  
18  
19  
20  
21  
22  
23  
24  
25  
26  
27  
28  
29  
30  
31  
32  
33  
34  
35  
36  
37  
38  
39  
40  
41  
42  
43  
44  
45  
46  
47  
48  
49  
50  
51  
52  
53  
54  
55  
56  
57  
58  
59  
60

- 1 M. A. Blais, editors: Handbook of clinical rating scales and assessment in psychiatry and mental  
2 health. New York: Humana Press 2010.
- 3 31. Higgins JPT, Altman DG, Gøtzsche PC, et al. The Cochrane Collaboration's tool for assessing  
4 risk of bias in randomised trials. *BMJ* 2011;343:1–9.
- 5 32. Review Manager (RevMan) [Computer program]. Version 5.3. Copenhagen: The Nordic  
6 Cochrane Centre, The Cochrane Collaboration, 2014.
- 7 33. Cohen J. A power primer. *Psychol Bull* 1992;112:155–159.
- 8 34. Higgins JPT, Thompson SG. Quantifying heterogeneity in a meta-analysis. *Stat Med*  
9 2002;21:1539–58.
- 10 35. Higgins JPT, Green S, editors. Cochrane Handbook for Systematic Reviews of Interventions  
11 Version 5.1.0 [updated March 2011]. United Kingdom: The Cochrane Collaboration 2011.
- 12 36. Hunter JE, Schmidt FL. Fixed Effects vs. random effects Meta-Analysis models: implications for  
13 Cumulative Research Knowledge. *INT J Select Assess* 2000;8:275–92.
- 14 37. Labrague LJ, McEnroe-Petitte DM. Job stress in new nurses during the transition period: An  
15 integrative review. *Int Nurs Rev* 2018;65:491–504.
- 16 38. Feng R-F, Tsai Y-F. Socialisation of new graduate nurses to practising nurses. *J Clin Nurs*  
17 2012;21:2064–71.
- 18 39. Theisen JL, Sandau KE. Competency of new graduate nurses: A review of their weaknesses and  
19 strategies for success. *J Contin Educ Nurs* 2013;44:406–14.

1  
2  
3 Supplementary File 1.  
4  
5

6 Search terms for PubMed  
7

8 (nurse[tiab] OR nurses[tiab] OR nursing[tw] OR nursery[tw] OR “health personnel”[tw] OR  
9 “health care personnel”[tw] OR “healthcare personnel”[tw] OR “health care worker”[tw] OR  
10 “health care workers”[tw] OR “healthcare worker”[tw] OR “healthcare workers”[tw] OR “health  
11 worker”[tw] OR “health workers”[tw] OR “health professional”[tw] OR “health professionals”[tw]  
12 OR “health care professional”[tw] OR “health care professionals”[tw] OR “healthcare  
13 professional”[tw] OR “healthcare professionals”[tw] OR “medical care personnel”[tw] OR “health  
14 staff”[tw] OR “health staffs”[tw] OR “healthcare staff”[tw] OR “healthcare staffs”[tw] OR “health  
15 care staff”[tw] OR “health care staffs”[tw]) AND (cognitive[tw] OR behavio\*[tw] OR  
16 mindfulness[tw] OR CBT[tw] OR ACT[tw]) AND (burnout[tw] OR anxiety[tw] OR anxious\*[tw]  
17 OR depression[tw] OR depress\*[tw] OR “mental health”[tw] OR stress\*[tw] OR distress[tw])  
18 AND (“randomized controlled trial”[pt] OR (randomized[tiab] AND controlled[tiab] AND  
19 trial[tiab]))  
20  
21  
22  
23  
24  
25  
26  
27  
28  
29  
30  
31  
32  
33  
34  
35  
36  
37  
38  
39  
40  
41  
42  
43  
44  
45  
46  
47  
48  
49  
50  
51  
52  
53  
54  
55  
56  
57  
58  
59  
60



1  
2  
3  
4  
5  
6  
7  
8  
9  
10  
11  
12  
13  
14  
15  
16  
17  
18  
19  
20  
21  
22  
23  
24  
25  
26  
27  
28  
29  
30  
31  
32  
33  
34  
35  
36  
37  
38  
39  
40  
41  
42  
43  
44  
45  
46

Supplementary File 2. Standardized form to assess eligibility for inclusion

| ID | Database | No | Title                                                                                                                                      | Author name                    | Source                                                          | Abstract                                                                                                                                                                                                                                                                                                                                                                                                                                                                                                                                                                                                                                                                                                                                                                                                                                                                                                                                                                                                                                                                                                                                                                                                                                                                                                                                                                          | URL | reviewer 1 | reviewer 2 | Result_ screening 1 | Result_ screening 2 | Result_ discussion |
|----|----------|----|--------------------------------------------------------------------------------------------------------------------------------------------|--------------------------------|-----------------------------------------------------------------|-----------------------------------------------------------------------------------------------------------------------------------------------------------------------------------------------------------------------------------------------------------------------------------------------------------------------------------------------------------------------------------------------------------------------------------------------------------------------------------------------------------------------------------------------------------------------------------------------------------------------------------------------------------------------------------------------------------------------------------------------------------------------------------------------------------------------------------------------------------------------------------------------------------------------------------------------------------------------------------------------------------------------------------------------------------------------------------------------------------------------------------------------------------------------------------------------------------------------------------------------------------------------------------------------------------------------------------------------------------------------------------|-----|------------|------------|---------------------|---------------------|--------------------|
| 1  | PubMed   | 1  | Mindfulness-based stress reduction training yields improvements in well-being and rates of perceived nursing errors among hospital nurses. | Daigle S, Talbot F, French DJ. | J Adv Nurs 2018; 74: 2427-2430. Date of Publication: 8 Jul 2018 | <p>INTRODUCTION:<br/>This pilot study aims to further document mindfulness-based stress reduction (MBSR)'s effect on well-being while exploring its impact on errors among hospital nurses.</p> <p>BACKGROUND:<br/>The concept of mindfulness has been found to be highly relevant to holistic nursing practices but remains understudied and underused. Preliminary evidence suggests that MBSR can reduce stress among nurses. As stress and mental processes such as inattention are potential sources of error, MBSR may also help to improve patient safety. Reducing errors is of significant relevance in healthcare settings.</p> <p>DESIGN:<br/>A randomized controlled trial with a matched pair design was conducted.</p> <p>METHODS:<br/>Seventy Registered Nurses and licensed practical nurses were randomized to MBSR (N = 37) or a waitlist control condition (N = 33).</p> <p>RESULTS:<br/>Intention-to-treat ANCOVAs revealed that MBSR produced significant improvements in distress. High levels of treatment satisfaction were reported by a majority of participants. Of the nurses who reported that errors had been a problem for them (28.6%), a perceived improvement was noticed by over a third (37.5%) at 3 months post-treatment.</p> <p>CONCLUSION:<br/>These initial findings suggest that the benefits of MBSR may extend to nursing errors.</p> |     | KK         | MS         | ○                   | ×                   | ×                  |

# Reporting checklist for protocol of a systematic review and meta analysis.

Based on the PRISMA-P guidelines.

## Instructions to authors

Complete this checklist by entering the page numbers from your manuscript where readers will find each of the items listed below.

Your article may not currently address all the items on the checklist. Please modify your text to include the missing information. If you are certain that an item does not apply, please write "n/a" and provide a short explanation.

Upload your completed checklist as an extra file when you submit to a journal.

In your methods section, say that you used the PRISMA-Reporting guidelines, and cite them as:

Moher D, Shamseer L, Clarke M, Ghersi D, Liberati A, Petticrew M, Shekelle P, Stewart LA. Preferred Reporting Items for Systematic Review and Meta-Analysis Protocols (PRISMA-P) 2015 statement. Syst Rev. 2015;4(1):1.

|                |                     | Reporting Item                                                                     | Page Number |
|----------------|---------------------|------------------------------------------------------------------------------------|-------------|
| <b>Title</b>   |                     |                                                                                    |             |
| Identification | <a href="#">#1a</a> | Identify the report as a protocol of a systematic review                           | 1           |
| Update         | <a href="#">#1b</a> | If the protocol is for an update of a previous systematic review, identify as such | n/a         |

1 **Registration**

2

3

4 [#2](#) If registered, provide the name of the registry PROSPERO

5 (such as PROSPERO) and registration number registration number

6

7

8

9 CRD42020152837

10

11 **Authors**

12

13

14

15 **Contact** [#3a](#) Provide name, institutional affiliation, e-mail 1

16 address of all protocol authors; provide

17 physical mailing address of corresponding

18 author

19

20

21

22

23

24

25 **Contribution** [#3b](#) Describe contributions of protocol authors and 10-11

26 identify the guarantor of the review

27

28

29

30 **Amendments**

31

32

33 [#4](#) If the protocol represents an amendment of a n/a

34 previously completed or published protocol,

35 identify as such and list changes; otherwise,

36 state plan for documenting important protocol

37 amendments

38

39

40

41

42

43

44

45 **Support**

46

47

48 **Sources** [#5a](#) Indicate sources of financial or other support 11

49 for the review

50

51

52

53

54 **Sponsor** [#5b](#) Provide name for the review funder and / or n/a

55 sponsor

56

57

58

59

60

|    |                      |                     |                                                    |     |
|----|----------------------|---------------------|----------------------------------------------------|-----|
| 1  | Role of sponsor      | <a href="#">#5c</a> | Describe roles of funder(s), sponsor(s), and / or  | n/a |
| 2  |                      |                     |                                                    |     |
| 3  | or funder            |                     | institution(s), if any, in developing the protocol |     |
| 4  |                      |                     |                                                    |     |
| 5  |                      |                     |                                                    |     |
| 6  | <b>Introduction</b>  |                     |                                                    |     |
| 7  |                      |                     |                                                    |     |
| 8  |                      |                     |                                                    |     |
| 9  |                      |                     |                                                    |     |
| 10 | Rationale            | <a href="#">#6</a>  | Describe the rationale for the review in the       | 5-6 |
| 11 |                      |                     | context of what is already known                   |     |
| 12 |                      |                     |                                                    |     |
| 13 |                      |                     |                                                    |     |
| 14 |                      |                     |                                                    |     |
| 15 | Objectives           | <a href="#">#7</a>  | Provide an explicit statement of the question(s)   | 6   |
| 16 |                      |                     | the review will address with reference to          |     |
| 17 |                      |                     | participants, interventions, comparators, and      |     |
| 18 |                      |                     | outcomes (PICO)                                    |     |
| 19 |                      |                     |                                                    |     |
| 20 |                      |                     |                                                    |     |
| 21 |                      |                     |                                                    |     |
| 22 |                      |                     |                                                    |     |
| 23 |                      |                     |                                                    |     |
| 24 |                      |                     |                                                    |     |
| 25 | <b>Methods</b>       |                     |                                                    |     |
| 26 |                      |                     |                                                    |     |
| 27 |                      |                     |                                                    |     |
| 28 | Eligibility criteria | <a href="#">#8</a>  | Specify the study characteristics (such as         | 6-7 |
| 29 |                      |                     | PICO, study design, setting, time frame) and       |     |
| 30 |                      |                     | report characteristics (such as years              |     |
| 31 |                      |                     | considered, language, publication status) to be    |     |
| 32 |                      |                     | used as criteria for eligibility for the review    |     |
| 33 |                      |                     |                                                    |     |
| 34 |                      |                     |                                                    |     |
| 35 |                      |                     |                                                    |     |
| 36 |                      |                     |                                                    |     |
| 37 |                      |                     |                                                    |     |
| 38 |                      |                     |                                                    |     |
| 39 |                      |                     |                                                    |     |
| 40 | Information          | <a href="#">#9</a>  | Describe all intended information sources          | 7-8 |
| 41 |                      |                     | (such as electronic databases, contact with        |     |
| 42 | sources              |                     | study authors, trial registers or other grey       |     |
| 43 |                      |                     | literature sources) with planned dates of          |     |
| 44 |                      |                     | coverage                                           |     |
| 45 |                      |                     |                                                    |     |
| 46 |                      |                     |                                                    |     |
| 47 |                      |                     |                                                    |     |
| 48 |                      |                     |                                                    |     |
| 49 |                      |                     |                                                    |     |
| 50 |                      |                     |                                                    |     |
| 51 |                      |                     |                                                    |     |
| 52 | Search strategy      | <a href="#">#10</a> | Present draft of search strategy to be used for    | 7-8 |
| 53 |                      |                     | at least one electronic database, including        |     |
| 54 |                      |                     | planned limits, such that it could be repeated     |     |
| 55 |                      |                     |                                                    |     |
| 56 |                      |                     |                                                    |     |
| 57 |                      |                     |                                                    |     |
| 58 |                      |                     |                                                    |     |
| 59 |                      |                     |                                                    |     |
| 60 |                      |                     |                                                    |     |

|    |                 |                      |                                                   |     |
|----|-----------------|----------------------|---------------------------------------------------|-----|
| 1  | Study records - | <a href="#">#11a</a> | Describe the mechanism(s) that will be used to    | 7-8 |
| 2  |                 |                      |                                                   |     |
| 3  | data            |                      | manage records and data throughout the            |     |
| 4  |                 |                      |                                                   |     |
| 5  | management      |                      | review                                            |     |
| 6  |                 |                      |                                                   |     |
| 7  |                 |                      |                                                   |     |
| 8  |                 |                      |                                                   |     |
| 9  | Study records - | <a href="#">#11b</a> | State the process that will be used for selecting | 8   |
| 10 |                 |                      |                                                   |     |
| 11 | selection       |                      | studies (such as two independent reviewers)       |     |
| 12 |                 |                      |                                                   |     |
| 13 | process         |                      | through each phase of the review (that is,        |     |
| 14 |                 |                      |                                                   |     |
| 15 |                 |                      | screening, eligibility and inclusion in meta-     |     |
| 16 |                 |                      | analysis)                                         |     |
| 17 |                 |                      |                                                   |     |
| 18 |                 |                      |                                                   |     |
| 19 |                 |                      |                                                   |     |
| 20 |                 |                      |                                                   |     |
| 21 | Study records - | <a href="#">#11c</a> | Describe planned method of extracting data        | 8   |
| 22 |                 |                      |                                                   |     |
| 23 | data collection |                      | from reports (such as piloting forms, done        |     |
| 24 |                 |                      |                                                   |     |
| 25 | process         |                      | independently, in duplicate), any processes for   |     |
| 26 |                 |                      |                                                   |     |
| 27 |                 |                      | obtaining and confirming data from                |     |
| 28 |                 |                      |                                                   |     |
| 29 |                 |                      | investigators                                     |     |
| 30 |                 |                      |                                                   |     |
| 31 |                 |                      |                                                   |     |
| 32 |                 |                      |                                                   |     |
| 33 | Data items      | <a href="#">#12</a>  | List and define all variables for which data will | 6-7 |
| 34 |                 |                      |                                                   |     |
| 35 |                 |                      | be sought (such as PICO items, funding            |     |
| 36 |                 |                      |                                                   |     |
| 37 |                 |                      | sources), any pre-planned data assumptions        |     |
| 38 |                 |                      |                                                   |     |
| 39 |                 |                      | and simplifications                               |     |
| 40 |                 |                      |                                                   |     |
| 41 |                 |                      |                                                   |     |
| 42 |                 |                      |                                                   |     |
| 43 | Outcomes and    | <a href="#">#13</a>  | List and define all outcomes for which data will  | 6-7 |
| 44 |                 |                      |                                                   |     |
| 45 | prioritization  |                      | be sought, including prioritization of main and   |     |
| 46 |                 |                      |                                                   |     |
| 47 |                 |                      | additional outcomes, with rationale               |     |
| 48 |                 |                      |                                                   |     |
| 49 |                 |                      |                                                   |     |
| 50 |                 |                      |                                                   |     |
| 51 | Risk of bias in | <a href="#">#14</a>  | Describe anticipated methods for assessing        | 8-9 |
| 52 |                 |                      |                                                   |     |
| 53 | individual      |                      | risk of bias of individual studies, including     |     |
| 54 |                 |                      |                                                   |     |
| 55 | studies         |                      | whether this will be done at the outcome or       |     |
| 56 |                 |                      |                                                   |     |
| 57 |                 |                      |                                                   |     |
| 58 |                 |                      |                                                   |     |
| 59 |                 |                      |                                                   |     |
| 60 |                 |                      |                                                   |     |

|    |                |                                                                       |      |
|----|----------------|-----------------------------------------------------------------------|------|
| 1  |                | study level, or both; state how this information                      |      |
| 2  |                | will be used in data synthesis                                        |      |
| 3  |                |                                                                       |      |
| 4  |                |                                                                       |      |
| 5  |                |                                                                       |      |
| 6  | Data synthesis | <a href="#">#15a</a> Describe criteria under which study data will be | 9-10 |
| 7  |                | quantitatively synthesised                                            |      |
| 8  |                |                                                                       |      |
| 9  |                |                                                                       |      |
| 10 |                |                                                                       |      |
| 11 | Data synthesis | <a href="#">#15b</a> If data are appropriate for quantitative         | 9-10 |
| 12 |                | synthesis, describe planned summary                                   |      |
| 13 |                | measures, methods of handling data and                                |      |
| 14 |                | methods of combining data from studies,                               |      |
| 15 |                | including any planned exploration of                                  |      |
| 16 |                | consistency (such as I <sup>2</sup> , Kendall's $\tau$ )              |      |
| 17 |                |                                                                       |      |
| 18 |                |                                                                       |      |
| 19 |                |                                                                       |      |
| 20 |                |                                                                       |      |
| 21 |                |                                                                       |      |
| 22 |                |                                                                       |      |
| 23 |                |                                                                       |      |
| 24 |                |                                                                       |      |
| 25 | Data synthesis | <a href="#">#15c</a> Describe any proposed additional analyses        | 9-10 |
| 26 |                | (such as sensitivity or subgroup analyses,                            |      |
| 27 |                | meta-regression)                                                      |      |
| 28 |                |                                                                       |      |
| 29 |                |                                                                       |      |
| 30 |                |                                                                       |      |
| 31 |                |                                                                       |      |
| 32 |                |                                                                       |      |
| 33 | Data synthesis | <a href="#">#15d</a> If quantitative synthesis is not appropriate,    | 9    |
| 34 |                | describe the type of summary planned                                  |      |
| 35 |                |                                                                       |      |
| 36 |                |                                                                       |      |
| 37 |                |                                                                       |      |
| 38 | Meta-bias(es)  | <a href="#">#16</a> Specify any planned assessment of meta-           | 9    |
| 39 |                | bias(es) (such as publication bias across                             |      |
| 40 |                | studies, selective reporting within studies)                          |      |
| 41 |                |                                                                       |      |
| 42 |                |                                                                       |      |
| 43 |                |                                                                       |      |
| 44 |                |                                                                       |      |
| 45 |                |                                                                       |      |
| 46 | Confidence in  | <a href="#">#17</a> Describe how the strength of the body of          | 10   |
| 47 |                | evidence will be assessed (such as GRADE)                             |      |
| 48 | cumulative     |                                                                       |      |
| 49 | evidence       |                                                                       |      |
| 50 |                |                                                                       |      |
| 51 |                |                                                                       |      |
| 52 |                |                                                                       |      |
| 53 |                |                                                                       |      |
| 54 | Notes:         |                                                                       |      |
| 55 |                |                                                                       |      |
| 56 |                |                                                                       |      |
| 57 |                |                                                                       |      |
| 58 |                |                                                                       |      |
| 59 |                |                                                                       |      |
| 60 |                |                                                                       |      |

- 1 • 2: PROSPERO registration number CRD42020152837 The PRISMA-P elaboration and  
2 explanation paper is distributed under the terms of the Creative Commons Attribution License  
3 CC-BY. This checklist was completed on 18. January 2022 using <https://www.goodreports.org/>, a  
4  
5 tool made by the [EQUATOR Network](#) in collaboration with [Penelope.ai](#)  
6  
7  
8  
9  
10  
11  
12  
13  
14  
15  
16  
17  
18  
19  
20  
21  
22  
23  
24  
25  
26  
27  
28  
29  
30  
31  
32  
33  
34  
35  
36  
37  
38  
39  
40  
41  
42  
43  
44  
45  
46  
47  
48  
49  
50  
51  
52  
53  
54  
55  
56  
57  
58  
59  
60

# BMJ Open

## The effect of stress management based on cognitive behavioral therapy on nurses as a universal prevention in the workplace: a systematic review and meta-analysis protocol

|                                 |                                                                                                                                                                                                                                                                                                                                                                                                                                                                                                                                                                                                                  |
|---------------------------------|------------------------------------------------------------------------------------------------------------------------------------------------------------------------------------------------------------------------------------------------------------------------------------------------------------------------------------------------------------------------------------------------------------------------------------------------------------------------------------------------------------------------------------------------------------------------------------------------------------------|
| Journal:                        | <i>BMJ Open</i>                                                                                                                                                                                                                                                                                                                                                                                                                                                                                                                                                                                                  |
| Manuscript ID                   | bmjopen-2022-062516.R1                                                                                                                                                                                                                                                                                                                                                                                                                                                                                                                                                                                           |
| Article Type:                   | Protocol                                                                                                                                                                                                                                                                                                                                                                                                                                                                                                                                                                                                         |
| Date Submitted by the Author:   | 08-Jun-2022                                                                                                                                                                                                                                                                                                                                                                                                                                                                                                                                                                                                      |
| Complete List of Authors:       | Kuribayashi, Kazuto; Tokyo Medical and Dental University Graduate School of Health Care Sciences, Department of Mental Health and Psychiatric Nursing<br>Takano, Ayumi; Tokyo Medical and Dental University Graduate School of Health Care Sciences, Department of Mental Health and Psychiatric Nursing<br>Inagaki, Akiko; Tokyo Healthcare University, Faculty of Healthcare, Division of Nursing<br>Imamura, Kotaro; The University of Tokyo, Graduate School of Medicine, Department of Mental Health<br>Kawakami, Norito; The University of Tokyo, Graduate School of Medicine, Department of Mental Health |
| <b>Primary Subject Heading</b>: | Mental health                                                                                                                                                                                                                                                                                                                                                                                                                                                                                                                                                                                                    |
| Secondary Subject Heading:      | Nursing                                                                                                                                                                                                                                                                                                                                                                                                                                                                                                                                                                                                          |
| Keywords:                       | MENTAL HEALTH, OCCUPATIONAL & INDUSTRIAL MEDICINE, Depression & mood disorders < PSYCHIATRY                                                                                                                                                                                                                                                                                                                                                                                                                                                                                                                      |
|                                 |                                                                                                                                                                                                                                                                                                                                                                                                                                                                                                                                                                                                                  |

SCHOLARONE™  
Manuscripts



1  
2  
3  
4  
5  
6 1 June 3, 2022S

7 2

8  
9 3 The effect of stress management based on cognitive behavioral therapy on nurses as a universal  
10 4 prevention in the workplace: a systematic review and meta-analysis protocol

11 5

12 6

13 7 Authors

14 8 Kazuto Kuribayashi<sup>1</sup>

15 9 E-mail: kkuribayashi-jans@umin.ac.jp

16 10 Ayumi Takano<sup>1</sup>

17 11 E-mail: ayumi-takano@umin.ac.jp

18 12 Akiko Inagaki<sup>2</sup>

19 13 akikok-tyk@umin.ac.jp

20 14 Kotaro Imamura<sup>3</sup>

21 15 E-mail: kouima-tyk@umin.ac.jp

22 16 Norito Kawakami<sup>3</sup>

23 17 E-mail: norito@m.u-tokyo.ac.jp

24 18

25 19 Correspondence to: Kazuto Kuribayashi

26 20 Department of Mental Health and Psychiatric Nursing, Graduate School of Health Care Sciences,

27 21 Tokyo Medical and Dental University,

28 22 1-5-45 Yushima, Bunkyo-ku, Tokyo 113-8510, JAPAN

29 23 Tel: +81-3-5803-5336

30 24 E-mail: kkuribayashi-jans@umin.ac.jp

31 25

32 26

33 27 Authors' information

34 28 <sup>1</sup>Department of Mental Health and Psychiatric Nursing, Graduate School of Health Care Sciences,

35 29 Tokyo Medical and Dental University, 1-5-45 Yushima, Bunkyo-ku, Tokyo 113-8510, Japan.

36 30 <sup>2</sup>Division of Nursing, Faculty of Healthcare, Tokyo Healthcare University, 4-1-17 Higashigotanda,

37 31 Shinagawa-ku, Tokyo 141-8648, Japan.

38 32 <sup>3</sup>Department of Mental Health, Graduate School of Medicine, The University of Tokyo, 7-3-1 Hongo,

39 33 Bunkyo-ku, Tokyo 113-0033, Japan.

40 34

41 35 **Keywords:** Nurse, Cognitive behavioral therapy, Universal prevention, Systematic review, Meta-  
42 36 analysis

1  
2  
3  
4  
5  
6  
7  
8  
9  
10  
11  
12  
13  
14  
15  
16  
17  
18  
19  
20  
21  
22  
23  
24  
25  
26  
27  
28  
29  
30  
31  
32  
33  
34  
35  
36  
37  
38  
39  
40  
41  
42  
43  
44  
45  
46  
47  
48  
49  
50  
51  
52  
53  
54  
55  
56  
57  
58  
59  
60

1  
2 **Word count: 2,821**

For peer review only

## 1 **ABSTRACT**

### 2 **Introduction**

3 The mental health status of nurses affects not only their well-being but also the organizational  
4 outcomes and the quality of patient care. Hence, stress management strategies are critical as a universal  
5 prevention measure that address an entire population and are not directed at a specific risk group to  
6 maintain nurses' mental health in the workplace. No systematic review or meta-analysis has been  
7 conducted to evaluate the effect of cognitive behavioral therapy (CBT) that specifically focuses on  
8 universal prevention. Therefore, the aim of this study is to examine the effectiveness that is reported  
9 in published randomized controlled trial (RCT) studies.

### 10 **Methods and analysis**

11 This systematic review and meta-analysis will analyze published studies selected from electronic  
12 databases (i.e., Cochrane Central Register of Controlled Trials, PubMed, CINAHL, PsycINFO,  
13 PsycARTICLES, Web of Science, and the Japan Medical Abstracts Society). The inclusion criteria  
14 for studies are that they (1) were conducted to assess the effect of CBT on the mental health of nurses  
15 as a universal prevention, (2) used an RCT design, and (3) provided sufficient results (sample sizes,  
16 means, and standard deviations) to estimate the pooled effect sizes with 95% confidence intervals.  
17 Studies will be excluded if they only targeted nurses who had been screened as being at high risk in  
18 terms of their mental health and indicated that they required the prevention. The methodological  
19 quality of the included studies will be assessed using the Cochrane Collaboration's risk-of-bias tool.

### 20 **Ethics and dissemination**

21 Ethical approval is not required because this study is based on information obtained from previous  
22 studies. The results and findings of this study will be submitted for publication in a peer-reviewed  
23 international scientific journal. Results from this study will be helpful when implementing CBT  
24 strategies for nurses as a universal preventative measure in the workplace and for managing stress-  
25 related outcomes.

### 27 **Strengths and limitations of this study**

28 ► This systematic review and meta-analysis will offer the strongest evidence about the effectiveness  
29 of CBT-based interventions on the mental health of nurses that can be applied as a universal prevention  
30 in the workplace.

31 ► This study will not include RCT studies that targeted only nurses who were screened as being high  
32 risk in terms of their mental health.

33 ► The findings from the study will be useful for conducting CBT-based stress management  
34 interventions for nurses in the workplace as a universal prevention and managing stress-related  
35 outcomes.

36 ► This study is limited because the findings cannot be generalized to countries or groups that are not

- 1 included in the selected studies.
- 2
- 3 PROSPERO registration number CRD42020152837.
- 4

For peer review only

## 1 INTRODUCTION

2 Studies of stress in nursing workplaces have reported that nurses have a high prevalence of probable  
3 occupational stress.[1,2] The main causes of the work-related stress among nurses are heavy  
4 workloads, interpersonal conflicts, the emotional impacts of care, lack of reward or control, and shift  
5 work.[3] Occupational stress is known to be a major risk factor for burnout, anxiety, and depression.[3]  
6 These mental health problems can lead to the worsening of the nurses' somatic symptoms or  
7 disorder,[4] insomnia,[5] the degradation of their quality of life,[6] and their work engagement,[7,8]  
8 and it can have adverse effects in the workplace (e.g., an increase in absenteeism [9] and the intention  
9 to leave employment[10]) and lead to a deterioration in the quality of care that the nurses provide.[2]  
10 As in nursing workplaces, there are seldom Employee Assistance Programs (EAP) that provide any  
11 formal stress management initiatives for employees to improve their mental health by learning coping  
12 mechanisms, due to lack of manpower, resources, and managers' awareness,[11] nurses can be  
13 vulnerable to depression due to the lack of stress management skills.[12] According to two surveys in  
14 the United States, the prevalence of depression in nurses varies from 18% to 35%, which is higher  
15 than in the general population.[4,13] Maintaining and improving nurses' mental health as a primary  
16 prevention (to prevent diseases before it occurs) is necessary not only for their well-being but also for  
17 improving their productivity, reducing workplace costs, and guaranteeing the quality of care for the  
18 patients.[14] Therefore, stress management for nurses is needed in nursing workplaces.  
19 Cognitive behavioral therapy (CBT) is one of the major stress management techniques for workers  
20 and it has been shown to have positive effects as a primary prevention. According to a meta-review[15]  
21 and several meta-analyses,[16,17] it has been proved that CBT, as a stress management technique,  
22 significantly improves occupational stress, anxiety, and depression for workers in the workplace.  
23 These meta-analyses concluded that CBT was more effective than other interventions.[16,17] In  
24 addition, in studies targeting nurses, a Cochrane review showed that CBT stress management  
25 interventions had significant positive effects on stress-related outcomes, including occupational stress  
26 and depressive symptoms, among nurses (standardized mean difference [SMD] = -0.34 at the six-  
27 month follow-up).[12] Thus, evidence about CBT-based stress management for nurses has  
28 accumulated.  
29 Primary prevention strategies for mental health problems can be classified into three categories; 1)  
30 universal prevention, which targets the general population and is not directed at a specific risk group,  
31 2) selective prevention, which targets individuals considered to be at potential risk for mental illness  
32 as based on the presence of an identified risk factor such as parental mental illness, and 3) indicated  
33 prevention which targets individuals who are screened for already having early signs or subthreshold  
34 symptoms of mental illness.[18–21] There are theoretical and practical reasons why universal  
35 prevention can be more appropriate for the workplace.[22] As universal prevention can reach more

1 individuals, including selected and indicated groups without the need for screening which is a costly  
2 process to implement,[18,22,23] and can reach individuals who disclose symptoms for fear of its  
3 perceived negative effects on work, the universal prevention of the nurses' mental health problems is  
4 a high-priority strategy for mental health management in nursing workplaces. Therefore, systematic  
5 reviews and meta-analyses are necessary to obtain a comprehensive understanding and conduct  
6 evidence-based interventions regarding the effect of CBT on nurses' mental health as a universal  
7 prevention in the workplace.

8 However, there has been no systematic review and/or meta-analysis that has specialized in the  
9 universal prevention effect of CBT on nurses' mental health. The abovementioned Cochrane review  
10 of stress management for nurses included studies of indicated prevention, which targeted only nurses  
11 at high risk who were sorted using a screening scale of mental health.[12] Other systematic reviews,  
12 as well, included studies that were not randomized or only for nurses who were screened as high-risk  
13 for their mental health.[1,24–26] Therefore, the effect of CBT-based stress management interventions  
14 for universal prevention among nurses has not been clearly identified in a systematic review and/or a  
15 meta-analysis. Further, various provisional methods and formats have been developed for CBT in  
16 recent years as well as conventional face-to-face implementations of CBT. For example, iCBT  
17 (internet-based CBT), in which CBT is provided through an Internet-based platform is attracting  
18 attention, and studies that evaluate its effectiveness and social implementations are underway.  
19 However, the Cochrane review regarding nurse stress management[12] included studies up to 2013  
20 and did not include new methods of implementation such as iCBT.

21 Therefore, the aim of this systematic review and meta-analysis is to evaluate the overall effectiveness  
22 of CBT-based interventions for stress management among nurses, including the recent studies, as a  
23 universal prevention in the workplace. We hypothesize that the CBT-based interventions will be  
24 effective for improving nurses' mental health as a universal prevention.

## 26 **METHODS AND ANALYSIS**

### 27 **Study design**

28 This study protocol for a systematic review and meta-analysis of intervention studies (randomized  
29 controlled trials; RCTs) follows the Preferred Reporting Items for Systematic Reviews and Meta-  
30 Analysis Protocols (PRISMA-P) guideline.[27] Findings will be reported according to the PRISMA  
31 statement.[28] The study protocol was registered with PROSPERO (CRD42020152837).

### 33 **Eligibility criteria**

34 The participants, interventions, comparisons, and outcomes (PICO) of the studies included in this  
35 systematic review and meta-analysis will be defined as follows: (P) healthy nurses (not diagnosed as  
36 having a mental illness), (I) any type or mode of CBT-based intervention, (C) no intervention or not a

1  
2  
3  
4  
5  
6 1 CBT-based intervention, and (O) mental health. We will include intervention studies (RCTs)  
7 2 conducted on the entire nurse population, including new graduate nurses (i.e., those with less than one  
8 3 year of nursing experience). Studies will be excluded if they correspond to selective or indicated  
9 4 prevention among primary prevention. This systematic review and meta-analysis focus on universal  
10 5 prevention as a primary strategy. Therefore, studies of selective or indicated prevention will be  
11 6 excluded from this review. In addition, we will exclude studies in which participants were practical  
12 7 nurses or nursing aides and those that involved other healthcare workers such as doctors in this  
13 8 systematic review and meta-analysis. There will be no exclusion criteria regarding participants'  
14 9 employment status or the healthcare settings in which they were employed. However, we will exclude  
15 10 studies that targeted individuals considered to be at potentially risk for mental illness according to an  
16 11 identified risk factor such as parental mental illness, or that exclusively targeted nurses who had been  
17 12 screened as being high risk in terms of their mental health. We will include studies with a CBT-based  
18 13 intervention that aimed to reduce burnout, anxiety, or depressive symptoms in the entire nursing  
19 14 population.

20 15 CBT is defined as an intervention that provides new ways to rationally think and/or behave in stressful  
21 16 situations, such as through cognitive restructuring, behavioral activation, problem solving,  
22 17 mindfulness-based cognitive therapy (MBCT), and acceptance and commitment therapy  
23 18 (ACT).[29,30] The comparisons will be defined as no intervention; waiting-list control; treatment as  
24 19 usual, such as education or training (but not CBT) that is provided by the nursing association; or  
25 20 alternative (not CBT) interventions. Aspects of mental health (i.e., primary outcome) will include  
26 21 burnout, anxiety, or depression, which are the adverse effects of occupational stress.[3] These will be  
27 22 assessed using such self-reported measures as the Maslach Burnout Inventory,[31] the General Health  
28 23 Questionnaire,[32] and the Beck Depression Inventory,[33] as well as structured interviews, including  
29 24 the Hamilton Rating Scale for Depression.[34] As secondary outcomes, we will consider occupational  
30 25 outcomes, which can be the adverse effects of mental health problems. These will include absenteeism,  
31 26 intention to leave current employment, degradation of care quality, work performance, or work  
32 27 engagement. Studies that did not conduct a statistical analysis to examine the intervention effects will  
33 28 be excluded.

34 29 Studies will be included in this systematic review and meta-analysis that (1) were conducted to  
35 30 evaluate the effect of CBT-based interventions on the mental health of nurses as a universal prevention,  
36 31 (2) used an RCT design, (3) did not exclusively target nurses who had been screened as being at high  
37 32 risk in terms of their mental health, (4) provide sufficient data (sample sizes, means, and standard  
38 33 deviations [SDs]) for calculating the effect sizes with 95% confidence intervals (CIs), (5) were  
39 34 published as original articles written in English or Japanese, and (6) were published up to 2022.

40 35  
41 36 **Information sources, search strategy, and data management**

1  
2  
3  
4  
5  
6 1 Systematic searches of published studies will be performed using the following electronic databases:  
7 2 Cochrane Central Register of Controlled Trials (CENTRAL), PubMed (MEDLINE), CINAHL,  
8 3 PsycINFO, PsycARTICLES, Web of Science, and the Japan Medical Abstracts Society. The search  
9 4 terms will include words related to the research PICO. The search strategy (i.e., the key terms) is listed  
10 5 in the online Supplementary File 1. Through systematic searches, we will also obtain information  
11 6 regarding studies that may have been completed but are not yet published. This search is essential to  
12 7 reduce publication bias in this systematic review. All identified studies will be managed using  
13 8 Microsoft Excel (Microsoft Corp., Redmond, WA, USA) files. Prior to the study selection process,  
14 9 duplicate citations in the Excel files will be excluded by KK who is a first author. Decisions about all  
15 10 of the studies will be recorded.  
16 11

### 12 **Study selection process**

13 13 The study selection process will include two phases. The first is a sifting phase. According to the  
14 14 inclusion criteria, three review authors (KK, AT, and AI) will independently conduct the screening of  
15 15 the studies. The titles and abstracts will be screened according to the eligibility criteria created earlier  
16 16 in the sifting phase. The second is the full text review phase. The full text of all eligible studies will  
17 17 be obtained and reviewed using a standardized form (see the online Supplementary File 2) to assess  
18 18 their eligibility for inclusion in this review. Any discrepancies in the assessment will be recorded, and  
19 19 if they cannot be resolved, they will be settled by discussion among all of the authors until a consensus  
20 20 is reached. The reference lists from the studies will be carefully examined for any additional eligible  
21 21 studies. We will directly contact the corresponding authors of the eligible studies if (1) the results of  
22 22 the publication are unclear or may be related to multiple interpretations, (2) the reported results did  
23 23 not show data relevant to our study analysis, or (3) the study has been registered for clinical trials but  
24 24 are not yet published. If we contact those corresponding authors but do not receive a reply, we will  
25 25 not include their articles in the analysis. We will describe the process in the paper, including contact  
26 26 with the corresponding authors. A flow chart will be provided to show the entire review process.  
27 27

### 28 **Data extraction**

29 29 The data will be independently extracted from the included studies by three review authors (KK, AT,  
30 30 and AI) using a standardized data extraction form (see the online Supplementary File 3). Any  
31 31 disagreement or inconsistencies will be recorded and solved by discussion among all of the authors  
32 32 until a consensus is reached. The extracted data will include the following: the year of publication,  
33 33 country where the study was conducted, number of participants included in the analysis, sampling  
34 34 framework, participants' demographic characteristics (i.e., mean age, sex proportions, years of nursing  
35 35 experience, and employment status), number of participants who were excluded or lost to follow-up,  
36 36 the contents of the intervention program, control condition (i.e., no intervention, waiting-list control,



1  
2  
3  
4  
5  
6 1 or other), outcome variables (i.e., stress-related outcomes such as burnout, anxiety, and depressive  
7 2 symptoms, or occupational outcomes such as absenteeism, intention to leave current employment,  
8 3 quality of care, work performance, or work engagement), length of follow-up, and sufficient data (i.e.,  
9 4 the number of participants in each group (N), mean differences (MD) between groups, and SD for  
10 5 outcomes) for calculating the effect size with 95% CIs for determining the effect of CBT on the mental  
11 6 health of nurses for universal prevention. This extraction format is experimental and can be modified  
12 7 as needed. The relevant research teams of the studies will be contacted about the availability of  
13 8 unpublished or missing data.  
14  
15  
16  
17  
18  
19

### 20 **Risk-of-bias assessment**

21 11 Three review authors (KK, AT, and AI) will independently assess the methodological quality of the  
22 12 included studies using the Cochrane Collaboration's risk-of-bias tool.[35] The tool evaluates possible  
23 13 sources of bias in intervention studies based on seven main categories: (1) random sequence generation,  
24 14 (2) allocation concealment, (3) blinding of the participants and personnel, (4) blinding of the outcome  
25 15 assessment, (5) incomplete outcome data, (6) selective outcome reporting, and (7) other biases.  
26 16 Inconsistencies in the quality assessment of the methodology will be recorded and discussed by all of  
27 17 the authors until a consensus is reached. For the assessment of the meta-bias, the publication bias will  
28 18 be assessed using funnel plots for asymmetry and Egger's test.  
29  
30  
31  
32  
33

### 34 **Data synthesis and statistical methods**

35 21 The included studies will be statistically synthesized by a meta-analysis to estimate the pooled effect  
36 22 (SMD) of CBT on the mental health of nurses as a universal prevention in the workplace. We will  
37 23 combine studies that we determine to be similar in terms of follow-up time. We will consider the  
38 24 effects over the following follow-up periods: (i) Up to one month, (ii) From one month to six months,  
39 25 or (iii) Over six months. Forest plots of the between-group and post-intervention effect sizes for mental  
40 26 health and the 95% CIs will be produced. The number of participants and the scores, such as the means  
41 27 and *SDs* for the intervention and the control group for the psychological outcomes, will be entered  
42 28 into Review Manager (RevMan).[36] The magnitude of the effect size will be interpreted as being  
43 29 small (0.2), medium (0.5), or large (0.8).[37]

44 30 The meta-analysis will be performed when at least three eligible studies can be collected. If it is not  
45 31 appropriate to perform a meta-analysis (i.e., no more than two studies are eligible and included), the  
46 32 results will be presented in a narrative form. The publication bias will be examined using a funnel plot  
47 33 and Egger's test. Statistical heterogeneity will be assessed using the chi-square ( $\chi^2$ ) test with Cochran's  
48 34 Q statistic and the *I*<sup>2</sup>. [38] The *I*<sup>2</sup> values of 25%, 50%, and 75% indicate low, medium, and high  
49 35 heterogeneity, respectively.[39] An *I*<sup>2</sup> value of 50% or more will be deemed to indicate considerable  
50 36 heterogeneity. If there is little or no statistical heterogeneity (i.e., an *I*<sup>2</sup> value of less than 50%) in a  
51  
52  
53  
54  
55  
56  
57  
58  
59  
60

1 comparison, we will pool the results using a fixed-effects model. If the  $I^2$  statistic is more than 50%,  
2 we will use a random-effects model.[40]

3 Since the effect of the CBT may differ according to the specific population, subgroup analyses will be  
4 conducted to compare the results. The major possible grouping characteristics will include newly  
5 graduated nurses because they have been reported to have higher stress-related outcomes, including  
6 depressive symptoms, compared to veteran nurses. [14,41–43] We will treat participants with  
7 more/less than 1 year of nursing experience as another stratification factor and conduct a subgroup  
8 analysis. In addition, the mode of CBT delivery (e.g., face-to-face vs computer-based CBT including  
9 iCBT) or outcome variables (i.e., burnout, anxiety, and depressive symptoms) will be considered as  
10 possible grouping characteristics. Any subgroup differences will be reported, and our findings will be  
11 explained by considering these differences. To assess the effect of the risk of bias on the pooled results,  
12 a sensitivity analysis will be conducted of the included studies that are only classified as low risk  
13 according to the Cochrane Collaboration's risk-of-bias tool.[35] All of the extracted data and analyzed  
14 results will be deposited by the corresponding author and they will be available for external reviewers  
15 and readers upon request.

#### 17 **Patient and public involvement statement**

18 This study will not involve any patients or participants because this study protocol is for a systematic  
19 review and meta-analysis.

#### 21 **Ethics and dissemination**

22 As this systematic review and meta-analysis will be based on previously published studies, it does not  
23 require ethical approval. The results and findings of this study will be published in peer-reviewed  
24 international journals and be presented at related research conferences, academic symposiums, and  
25 seminars.

#### 27 **STRENGTHS AND LIMITATIONS**

28 The greatest strength of this study is that, to the best of our knowledge, it will be the first systematic  
29 review and meta-analysis to offer evidence regarding the effect of CBT-based interventions on the  
30 mental health of nurses as a universal prevention in the workplace. Because the mental health status  
31 of nurses deleteriously affects not only the individuals but also the organizations and the quality of  
32 patient care,[2,14] if the effect of the CBT provided in the workplace as universal prevention is  
33 confirmed by this meta-analysis, it will be beneficial for nurses', occupation's, and patients' health.  
34 In addition, it will provide economic and productivity boosts in the workplace. The findings from this  
35 study will be helpful for conducting CBT-based stress management interventions for nurses as a  
36 universal prevention in the workplace and for managing stress-related outcomes.

1  
2  
3  
4  
5  
6 1 However, this study has the limitation that the generalization of our study findings to countries or  
7 2 groups that are not included in the selected studies will be limited. In addition, there is a limitation  
8 3 that the article search will be conducted only in two languages, which can exclude potentially  
9 4 important data published in other languages.  
10  
11  
12 5

### 13 6 **Acknowledgments**

14 7 We would like to thank Editage [<http://www.editage.com>] for editing and reviewing this manuscript  
15 8 for English language.  
16  
17 9

### 19 10 **Author Contributions**

20 11 The study was conceived and designed by KK, KI, AT, AI, and NK. The initial draft of the manuscript  
21 12 was written by KK, and all authors revised it critically for important intellectual content and  
22 13 contributed to the final manuscript. All authors read and approved the final manuscript. The entire  
23 14 study process (i.e., the data collection, assessment, and synthesis) will be conducted by all of the  
24 15 authors.  
25  
26  
27  
28 16

### 30 17 **Funding statement**

31 18 This research received no specific grant from any funding agency in the public, commercial, or not-  
32 19 for-profit sectors.  
33  
34 20

### 36 21 **Competing interests statement**

37 22 The authors declare no conflict of interest.  
38  
39 23  
40 24

### 42 25 **References**

- 43 26 1. Mimura C, Griffiths P. The effectiveness of current approaches to workplace stress management  
44 27 in the nursing profession: An evidence based literature review. *Occup Environ Med* 2003;60:10–  
45 28 5.
- 46 29 2. Jun J, Ojemeni MM, Kalamani R, et al. Relationship between nurse burnout, patient and  
47 30 organizational outcomes: Systematic review. *Int J Nurs Stud* 2021;119:103933.
- 48 31 3. McVicar A. Workplace stress in nursing: A literature review. *J Adv Nurs* 2003;44:633–42.
- 49 32 4. Welsh D. Predictors of depressive symptoms in female medical-surgical hospital nurses. *Issues*  
50 33 *Ment. Health Nurs.* 2009;30:320–6.
- 51 34 5. Pappa S, Ntella V, Giannakas T, et al. Prevalence of depression, anxiety, and insomnia among  
52 35 healthcare workers during the COVID-19 pandemic: A systematic review and meta-analysis.  
53 36 *Brain Behav Immun* 2020;88:901-907.

- 1
- 2
- 3
- 4
- 5
- 6 1 6. Nowrouzi B, Lightfoot N, Larivière M, et al. Occupational Stress Management and Burnout
- 7 2 Interventions in Nursing and Their Implications for Healthy Work Environments: A Literature
- 8 3 Review. *Workplace Health Saf* 2015;63:308-15.
- 9
- 10 4 7. Innstrand ST, Langballe EM, Falkum E. A longitudinal study of the relationship between work
- 11 5 engagement and symptoms of anxiety and depression. *Stress Heal* 2012;28:1–10.
- 12
- 13 6 8. García-Sierra R, Fernández-Castro J, Martínez-Zaragoza F. Work engagement in nursing: An
- 14 7 integrative review of the literature. *J Nurs Manag* 2016;24:E101-11.
- 15
- 16 8 9. Davey MM, Cummings G, Newburn-Cook CV, et al. Predictors of nurse absenteeism in
- 17 9 hospitals: A systematic review. *J Nurs Manag* 2009;17:312-30.
- 18
- 19 10 10. Halter M, Boiko O, Pelone F, et al. The determinants and consequences of adult nursing staff
- 20 11 turnover: A systematic review of systematic reviews. *BMC Health Serv Res* 2017;17:824.
- 21
- 22 12 11. Yung PMB, Fung MY, Chan TMF, et al. Relaxation training methods for nurse managers in
- 23 13 Hong Kong: A controlled study. *Int J Ment Health Nurs* 2004;13:255–61.
- 24
- 25 14 12. Ruotsalainen JH, Verbeek JH, Mariné A, et al. Preventing occupational stress in healthcare
- 26 15 workers. *Cochrane database Syst Rev* 2015;CD002892.
- 27
- 28 16 13. Letvak S, Ruhm CJ, McCoy T. Depression in hospital-employed nurses. *Clin Nurse Spec*
- 29 17 2012;26:177-82.
- 30
- 31 18 14. Brandford AA, Reed DB. Depression in Registered Nurses: A State of the Science. *Workplace*
- 32 19 *Health Saf* 2016;64:488–511.
- 33
- 34 20 15. Joyce S, Modini M, Christensen H, et al. Workplace interventions for common mental disorders:
- 35 21 A systematic meta-review. *Psychol Med* 2016;46:683–97.
- 36
- 37 22 16. van der Klink JJ, Blonk RW, Schene AH, et al. The benefits of interventions for work-related
- 38 23 stress. *Am J Public Health* 2001;91:270–6.
- 39
- 40 24 17. Richardson KM, Rothstein HR. Effects of occupational stress management intervention
- 41 25 programs: A meta-analysis. *J Occup Health Psychol* 2008;13:69–93.
- 42
- 43 26 18. McLaughlin KA. The Public Health Impact of Major Depression: A Call for Interdisciplinary
- 44 27 Prevention Efforts. *Prev Sci* 2011;12:361–71.
- 45
- 46 28 19. World Health Organization. Prevention of mental disorders: Effective interventions and policy
- 47 29 implications. Geneva: WHO, 2004.
- 48
- 49 30 20. Miller, J. E. Mental illness prevention. Alexandria, VA: American Mental Health Counselors
- 50 31 Association, 2014.
- 51
- 52 32 21. Estradé A, Salazar de Pablo G, Zanotti A, et al. Public health primary prevention implemented by
- 53 33 clinical high-risk services for psychosis. *Transl Psychiatry* 2022;12:43.
- 54
- 55 34 22. Tan L, Wang MJ, Modini M, et al. Preventing the development of depression at work: A
- 56 35 systematic review and meta-analysis of universal interventions in the workplace. *BMC Med*
- 57 36 2014;12.
- 58
- 59
- 60

1  
2  
3  
4  
5  
6  
7  
8  
9  
10  
11  
12  
13  
14  
15  
16  
17  
18  
19  
20  
21  
22  
23  
24  
25  
26  
27  
28  
29  
30  
31  
32  
33  
34  
35  
36  
37  
38  
39  
40  
41  
42  
43  
44  
45  
46  
47  
48  
49  
50  
51  
52  
53  
54  
55  
56  
57  
58  
59  
60

- 1 23. Lynch FL, Hornbrook M, Clarke GN, et al. Cost-effectiveness of an intervention to prevent depression in at-risk teens. *Arch Gen Psychiatry* 2005;62:1241–8.
- 2
- 3 24. Edwards D, Burnard P. A systematic review of stress and stress management interventions for mental health nurses. *J Adv Nurs* 2003;42:169–200.
- 4
- 5 25. Romppanen J, Häggman-Laitila A. Interventions for nurses' well-being at work: A quantitative systematic review. *J Adv Nurs* 2017;73:1555–69.
- 6
- 7 26. Westermann C, Kozak A, Harling M, et al. Burnout intervention studies for inpatient elderly care nursing staff: Systematic literature review. *Int J Nurs Stud* 2014;51:63–71.
- 8
- 9 27. Moher D, Shamseer L, Clarke M, et al. Preferred reporting items for systematic review and meta-analysis protocols (PRISMA-P) 2015 statement. *Syst Rev* 2015;4:1.
- 10
- 11 28. Moher D, Liberati A, Tetzlaff J, et al. Preferred Reporting Items for Systematic Reviews and Meta-Analyses: The PRISMA Statement. *Ann Intern Med* 2009;151:264–9.
- 12
- 13 29. Hofmann SG, Sawyer AT, Fang A. The empirical status of the “new wave” of CBT. *Psychiatr Clin North Am* 2010;33:701–10.
- 14
- 15 30. Beck AT, Dozois DJ. Cognitive therapy: Current status and future directions. *Annu Rev Med* 2011;62:397–409.
- 16
- 17 31. Maslach C, Jackson SE, Leiter MP. *The Maslach Burnout Inventory Manual*. 3rd Edition. Palo Alto, CA: Consulting Psychologists Press 1996.
- 18
- 19 32. Goldberg D, Williams P. *A User's Guide to the General Health Questionnaire*. London: NFER-Nelson 1991.
- 20
- 21 33. Beck A, Steer R, Brown G. *BDI-II, Beck depression inventory: Manual*. vi. San Antonio, Tex, Boston: Psychological Corp 1996.
- 22
- 23 34. Cusin C, Yang H, Yeung A, et al. Chapter 2 Rating Scales for Depression. pp.7-35; In: L.Baer, M. A. Blais, editors: *Handbook of clinical rating scales and assessment in psychiatry and mental health*. New York: Humana Press 2010.
- 24
- 25
- 26 35. Higgins JPT, Altman DG, Gøtzsche PC, et al. The Cochrane Collaboration's tool for assessing risk of bias in randomised trials. *BMJ* 2011;343:1–9.
- 27
- 28 36. Review Manager (RevMan) [Computer program]. Version 5.3. Copenhagen: The Nordic Cochrane Centre, The Cochrane Collaboration, 2014.
- 29
- 30 37. Cohen J. A power primer. *Psychol Bull* 1992;112:155–159.
- 31
- 32 38. Higgins JPT, Thompson SG. Quantifying heterogeneity in a meta-analysis. *Stat Med* 2002;21:1539–58.
- 33
- 34 39. Higgins JPT, Green S, editors. *Cochrane Handbook for Systematic Reviews of Interventions Version 5.1.0 [updated March 2011]*. United Kingdom: The Cochrane Collaboration 2011.
- 35
- 36 40. Hunter JE, Schmidt FL. Fixed Effects vs. random effects Meta-Analysis models: implications for Cumulative Research Knowledge. *INT J Select Assess* 2000;8:275–92.

- 1  
2  
3  
4  
5  
6 1 41. Labrague LJ, McEnroe-Petitte DM. Job stress in new nurses during the transition period: An  
7 2 integrative review. *Int Nurs Rev* 2018;65:491–504.  
8  
9 3 42. Feng R-F, Tsai Y-F. Socialisation of new graduate nurses to practising nurses. *J Clin Nurs*  
10 4 2012;21:2064–71.  
11 5 43. Theisen JL, Sandau KE. Competency of new graduate nurses: A review of their weaknesses and  
12 6 strategies for success. *J Contin Educ Nurs* 2013;44:406–14.  
13 7  
14  
15  
16  
17  
18  
19  
20  
21  
22  
23  
24  
25  
26  
27  
28  
29  
30  
31  
32  
33  
34  
35  
36  
37  
38  
39  
40  
41  
42  
43  
44  
45  
46  
47  
48  
49  
50  
51  
52  
53  
54  
55  
56  
57  
58  
59  
60

For peer review only

## Supplementary File 1.

## Search terms for PubMed

(nurse[tiab] OR nurses[tiab] OR nursing[tw] OR nursery[tw] OR “health personnel”[tw] OR “health care personnel”[tw] OR “healthcare personnel”[tw] OR “health care worker”[tw] OR “health care workers”[tw] OR “healthcare worker”[tw] OR “healthcare workers”[tw] OR “health worker”[tw] OR “health workers”[tw] OR “health professional”[tw] OR “health professionals”[tw] OR “health care professional”[tw] OR “health care professionals”[tw] OR “healthcare professional”[tw] OR “healthcare professionals”[tw] OR “medical care personnel”[tw] OR “health staff”[tw] OR “health staffs”[tw] OR “healthcare staff”[tw] OR “healthcare staffs”[tw] OR “health care staff”[tw] OR “health care staffs”[tw]) AND (cognitive[tw] OR behavio\*[tw] OR mindfulness[tw] OR CBT[tw] OR ACT[tw]) AND (burnout[tw] OR anxiety[tw] OR anxious\*[tw] OR depression[tw] OR depress\*[tw] OR “mental health”[tw] OR stress\*[tw] OR distress[tw]) AND (“randomized controlled trial”[pt] OR (randomized[tiab] AND controlled[tiab] AND trial[tiab]))

Supplementary File 2. Standardized form to assess eligibility for inclusion

| ID | Database | No | Title                                                                                                                                      | Author name                    | Source                                                          | Abstract                                                                                                                                                                                                                                                                                                                                                                                                                                                                                                                                                                                                                                                                                                                                                                                                                                                                                                                                                                                                                                                                                                                                                                                                                                                                                                                                                                          | URL | reviewer 1 | reviewer 2 | Result_ screening 1 | Result_ screening 2 | Result_ discussion |
|----|----------|----|--------------------------------------------------------------------------------------------------------------------------------------------|--------------------------------|-----------------------------------------------------------------|-----------------------------------------------------------------------------------------------------------------------------------------------------------------------------------------------------------------------------------------------------------------------------------------------------------------------------------------------------------------------------------------------------------------------------------------------------------------------------------------------------------------------------------------------------------------------------------------------------------------------------------------------------------------------------------------------------------------------------------------------------------------------------------------------------------------------------------------------------------------------------------------------------------------------------------------------------------------------------------------------------------------------------------------------------------------------------------------------------------------------------------------------------------------------------------------------------------------------------------------------------------------------------------------------------------------------------------------------------------------------------------|-----|------------|------------|---------------------|---------------------|--------------------|
| 1  | PubMed   | 1  | Mindfulness-based stress reduction training yields improvements in well-being and rates of perceived nursing errors among hospital nurses. | Daigle S, Talbot F, French DJ. | J Adv Nurs 2018; 74: 2427–2430. Date of Publication: 8 Jul 2018 | <p>INTRODUCTION:<br/>This pilot study aims to further document mindfulness-based stress reduction (MBSR)'s effect on well-being while exploring its impact on errors among hospital nurses.</p> <p>BACKGROUND:<br/>The concept of mindfulness has been found to be highly relevant to holistic nursing practices but remains understudied and underused. Preliminary evidence suggests that MBSR can reduce stress among nurses. As stress and mental processes such as inattention are potential sources of error, MBSR may also help to improve patient safety. Reducing errors is of significant relevance in healthcare settings.</p> <p>DESIGN:<br/>A randomized controlled trial with a matched pair design was conducted.</p> <p>METHODS:<br/>Seventy Registered Nurses and licensed practical nurses were randomized to MBSR (N = 37) or a waitlist control condition (N = 33).</p> <p>RESULTS:<br/>Intention-to-treat ANCOVAs revealed that MBSR produced significant improvements in distress. High levels of treatment satisfaction were reported by a majority of participants. Of the nurses who reported that errors had been a problem for them (28.6%), a perceived improvement was noticed by over a third (37.5%) at 3 months post-treatment.</p> <p>CONCLUSION:<br/>These initial findings suggest that the benefits of MBSR may extend to nursing errors.</p> |     | KK         | MS         | ○                   | ×                   | ×                  |

For peer review only



1  
2  
3  
4  
5  
6  
7  
8  
9  
10  
11  
12  
13  
14  
15  
16  
17  
18  
19  
20  
21  
22  
23  
24  
25  
26  
27  
28  
29  
30  
31  
32  
33  
34  
35  
36  
37  
38  
39  
40  
41  
42  
43  
44  
45  
46

Supplementary File 3. Standardized data extraction form

| ID | No | Title | Author | Source<br>(Database,<br>Journal,<br>Year) | Country<br>where the<br>study was<br>conducted | Number of<br>participants<br>included in<br>the analysis | Sampling<br>framework | Participants' demographic<br>characteristics<br>(imean age, sex<br>proportions, years of<br>nursing experience, and<br>employment status) | Number of<br>participants<br>who were<br>excluded or<br>lost to follow-<br>up | Contents of the<br>intervention program | Control condition<br>(no intervention,<br>waiting-list<br>control, or other) | Outcome<br>variables | Length<br>of follow-up | Sufficient data<br>(the number of participants in each group (N),<br>mean differences (MD) between groups, and<br>SD for outcomes) |
|----|----|-------|--------|-------------------------------------------|------------------------------------------------|----------------------------------------------------------|-----------------------|-------------------------------------------------------------------------------------------------------------------------------------------|-------------------------------------------------------------------------------|-----------------------------------------|------------------------------------------------------------------------------|----------------------|------------------------|------------------------------------------------------------------------------------------------------------------------------------|
|----|----|-------|--------|-------------------------------------------|------------------------------------------------|----------------------------------------------------------|-----------------------|-------------------------------------------------------------------------------------------------------------------------------------------|-------------------------------------------------------------------------------|-----------------------------------------|------------------------------------------------------------------------------|----------------------|------------------------|------------------------------------------------------------------------------------------------------------------------------------|

For peer review only

# Reporting checklist for protocol of a systematic review and meta analysis.

Based on the PRISMA-P guidelines.

## Instructions to authors

Complete this checklist by entering the page numbers from your manuscript where readers will find each of the items listed below.

Your article may not currently address all the items on the checklist. Please modify your text to include the missing information. If you are certain that an item does not apply, please write "n/a" and provide a short explanation.

Upload your completed checklist as an extra file when you submit to a journal.

In your methods section, say that you used the PRISMA-Reporting guidelines, and cite them as:

Moher D, Shamseer L, Clarke M, Ghersi D, Liberati A, Petticrew M, Shekelle P, Stewart LA. Preferred Reporting Items for Systematic Review and Meta-Analysis Protocols (PRISMA-P) 2015 statement. Syst Rev. 2015;4(1):1.

|                |                     | Reporting Item                                                                     | Page Number |
|----------------|---------------------|------------------------------------------------------------------------------------|-------------|
| <b>Title</b>   |                     |                                                                                    |             |
| Identification | <a href="#">#1a</a> | Identify the report as a protocol of a systematic review                           | 1           |
| Update         | <a href="#">#1b</a> | If the protocol is for an update of a previous systematic review, identify as such | n/a         |

1 **Registration**

2

3

4 [#2](#) If registered, provide the name of the registry PROSPERO

5 (such as PROSPERO) and registration number registration number

6

7 CRD42020152837

8

9

10

11 **Authors**

12

13

14

15 **Contact** [#3a](#) Provide name, institutional affiliation, e-mail 1

16 address of all protocol authors; provide

17 physical mailing address of corresponding

18 author

19

20

21

22

23

24

25 **Contribution** [#3b](#) Describe contributions of protocol authors and 10-11

26 identify the guarantor of the review

27

28

29

30 **Amendments**

31

32

33 [#4](#) If the protocol represents an amendment of a n/a

34 previously completed or published protocol,

35 identify as such and list changes; otherwise,

36 state plan for documenting important protocol

37 amendments

38

39

40

41

42

43

44

45 **Support**

46

47

48

49 **Sources** [#5a](#) Indicate sources of financial or other support 11

50 for the review

51

52

53

54 **Sponsor** [#5b](#) Provide name for the review funder and / or n/a

55 sponsor

56

57

58

59

60

|    |                      |                     |                                                    |     |
|----|----------------------|---------------------|----------------------------------------------------|-----|
| 1  | Role of sponsor      | <a href="#">#5c</a> | Describe roles of funder(s), sponsor(s), and / or  | n/a |
| 2  |                      |                     |                                                    |     |
| 3  | or funder            |                     | institution(s), if any, in developing the protocol |     |
| 4  |                      |                     |                                                    |     |
| 5  |                      |                     |                                                    |     |
| 6  | <b>Introduction</b>  |                     |                                                    |     |
| 7  |                      |                     |                                                    |     |
| 8  |                      |                     |                                                    |     |
| 9  |                      |                     |                                                    |     |
| 10 | Rationale            | <a href="#">#6</a>  | Describe the rationale for the review in the       | 5-6 |
| 11 |                      |                     | context of what is already known                   |     |
| 12 |                      |                     |                                                    |     |
| 13 |                      |                     |                                                    |     |
| 14 |                      |                     |                                                    |     |
| 15 | Objectives           | <a href="#">#7</a>  | Provide an explicit statement of the question(s)   | 6   |
| 16 |                      |                     | the review will address with reference to          |     |
| 17 |                      |                     | participants, interventions, comparators, and      |     |
| 18 |                      |                     | outcomes (PICO)                                    |     |
| 19 |                      |                     |                                                    |     |
| 20 |                      |                     |                                                    |     |
| 21 |                      |                     |                                                    |     |
| 22 |                      |                     |                                                    |     |
| 23 |                      |                     |                                                    |     |
| 24 |                      |                     |                                                    |     |
| 25 | <b>Methods</b>       |                     |                                                    |     |
| 26 |                      |                     |                                                    |     |
| 27 |                      |                     |                                                    |     |
| 28 | Eligibility criteria | <a href="#">#8</a>  | Specify the study characteristics (such as         | 6-7 |
| 29 |                      |                     | PICO, study design, setting, time frame) and       |     |
| 30 |                      |                     | report characteristics (such as years              |     |
| 31 |                      |                     | considered, language, publication status) to be    |     |
| 32 |                      |                     | used as criteria for eligibility for the review    |     |
| 33 |                      |                     |                                                    |     |
| 34 |                      |                     |                                                    |     |
| 35 |                      |                     |                                                    |     |
| 36 |                      |                     |                                                    |     |
| 37 |                      |                     |                                                    |     |
| 38 |                      |                     |                                                    |     |
| 39 |                      |                     |                                                    |     |
| 40 | Information          | <a href="#">#9</a>  | Describe all intended information sources          | 7-8 |
| 41 |                      |                     | (such as electronic databases, contact with        |     |
| 42 | sources              |                     | study authors, trial registers or other grey       |     |
| 43 |                      |                     | literature sources) with planned dates of          |     |
| 44 |                      |                     | coverage                                           |     |
| 45 |                      |                     |                                                    |     |
| 46 |                      |                     |                                                    |     |
| 47 |                      |                     |                                                    |     |
| 48 |                      |                     |                                                    |     |
| 49 |                      |                     |                                                    |     |
| 50 |                      |                     |                                                    |     |
| 51 |                      |                     |                                                    |     |
| 52 | Search strategy      | <a href="#">#10</a> | Present draft of search strategy to be used for    | 7-8 |
| 53 |                      |                     | at least one electronic database, including        |     |
| 54 |                      |                     | planned limits, such that it could be repeated     |     |
| 55 |                      |                     |                                                    |     |
| 56 |                      |                     |                                                    |     |
| 57 |                      |                     |                                                    |     |
| 58 |                      |                     |                                                    |     |
| 59 |                      |                     |                                                    |     |
| 60 |                      |                     |                                                    |     |

|    |                 |                      |                                                   |     |
|----|-----------------|----------------------|---------------------------------------------------|-----|
| 1  | Study records - | <a href="#">#11a</a> | Describe the mechanism(s) that will be used to    | 7-8 |
| 2  |                 |                      |                                                   |     |
| 3  | data            |                      | manage records and data throughout the            |     |
| 4  |                 |                      |                                                   |     |
| 5  | management      |                      | review                                            |     |
| 6  |                 |                      |                                                   |     |
| 7  |                 |                      |                                                   |     |
| 8  |                 |                      |                                                   |     |
| 9  | Study records - | <a href="#">#11b</a> | State the process that will be used for selecting | 8   |
| 10 |                 |                      |                                                   |     |
| 11 | selection       |                      | studies (such as two independent reviewers)       |     |
| 12 |                 |                      |                                                   |     |
| 13 | process         |                      | through each phase of the review (that is,        |     |
| 14 |                 |                      |                                                   |     |
| 15 |                 |                      | screening, eligibility and inclusion in meta-     |     |
| 16 |                 |                      | analysis)                                         |     |
| 17 |                 |                      |                                                   |     |
| 18 |                 |                      |                                                   |     |
| 19 |                 |                      |                                                   |     |
| 20 |                 |                      |                                                   |     |
| 21 | Study records - | <a href="#">#11c</a> | Describe planned method of extracting data        | 8   |
| 22 |                 |                      |                                                   |     |
| 23 | data collection |                      | from reports (such as piloting forms, done        |     |
| 24 |                 |                      |                                                   |     |
| 25 | process         |                      | independently, in duplicate), any processes for   |     |
| 26 |                 |                      |                                                   |     |
| 27 |                 |                      | obtaining and confirming data from                |     |
| 28 |                 |                      |                                                   |     |
| 29 |                 |                      | investigators                                     |     |
| 30 |                 |                      |                                                   |     |
| 31 |                 |                      |                                                   |     |
| 32 |                 |                      |                                                   |     |
| 33 | Data items      | <a href="#">#12</a>  | List and define all variables for which data will | 6-7 |
| 34 |                 |                      |                                                   |     |
| 35 |                 |                      | be sought (such as PICO items, funding            |     |
| 36 |                 |                      |                                                   |     |
| 37 |                 |                      | sources), any pre-planned data assumptions        |     |
| 38 |                 |                      |                                                   |     |
| 39 |                 |                      | and simplifications                               |     |
| 40 |                 |                      |                                                   |     |
| 41 |                 |                      |                                                   |     |
| 42 |                 |                      |                                                   |     |
| 43 | Outcomes and    | <a href="#">#13</a>  | List and define all outcomes for which data will  | 6-7 |
| 44 |                 |                      |                                                   |     |
| 45 | prioritization  |                      | be sought, including prioritization of main and   |     |
| 46 |                 |                      |                                                   |     |
| 47 |                 |                      | additional outcomes, with rationale               |     |
| 48 |                 |                      |                                                   |     |
| 49 |                 |                      |                                                   |     |
| 50 |                 |                      |                                                   |     |
| 51 | Risk of bias in | <a href="#">#14</a>  | Describe anticipated methods for assessing        | 8-9 |
| 52 |                 |                      |                                                   |     |
| 53 | individual      |                      | risk of bias of individual studies, including     |     |
| 54 |                 |                      |                                                   |     |
| 55 | studies         |                      | whether this will be done at the outcome or       |     |
| 56 |                 |                      |                                                   |     |
| 57 |                 |                      |                                                   |     |
| 58 |                 |                      |                                                   |     |
| 59 |                 |                      |                                                   |     |
| 60 |                 |                      |                                                   |     |

|    |                |                                                                       |      |
|----|----------------|-----------------------------------------------------------------------|------|
| 1  |                | study level, or both; state how this information                      |      |
| 2  |                | will be used in data synthesis                                        |      |
| 3  |                |                                                                       |      |
| 4  |                |                                                                       |      |
| 5  |                |                                                                       |      |
| 6  | Data synthesis | <a href="#">#15a</a> Describe criteria under which study data will be | 9-10 |
| 7  |                | quantitatively synthesised                                            |      |
| 8  |                |                                                                       |      |
| 9  |                |                                                                       |      |
| 10 |                |                                                                       |      |
| 11 | Data synthesis | <a href="#">#15b</a> If data are appropriate for quantitative         | 9-10 |
| 12 |                | synthesis, describe planned summary                                   |      |
| 13 |                | measures, methods of handling data and                                |      |
| 14 |                | methods of combining data from studies,                               |      |
| 15 |                | including any planned exploration of                                  |      |
| 16 |                | consistency (such as I <sup>2</sup> , Kendall's $\tau$ )              |      |
| 17 |                |                                                                       |      |
| 18 |                |                                                                       |      |
| 19 |                |                                                                       |      |
| 20 |                |                                                                       |      |
| 21 |                |                                                                       |      |
| 22 |                |                                                                       |      |
| 23 |                |                                                                       |      |
| 24 |                |                                                                       |      |
| 25 | Data synthesis | <a href="#">#15c</a> Describe any proposed additional analyses        | 9-10 |
| 26 |                | (such as sensitivity or subgroup analyses,                            |      |
| 27 |                | meta-regression)                                                      |      |
| 28 |                |                                                                       |      |
| 29 |                |                                                                       |      |
| 30 |                |                                                                       |      |
| 31 |                |                                                                       |      |
| 32 |                |                                                                       |      |
| 33 | Data synthesis | <a href="#">#15d</a> If quantitative synthesis is not appropriate,    | 9    |
| 34 |                | describe the type of summary planned                                  |      |
| 35 |                |                                                                       |      |
| 36 |                |                                                                       |      |
| 37 |                |                                                                       |      |
| 38 | Meta-bias(es)  | <a href="#">#16</a> Specify any planned assessment of meta-           | 9    |
| 39 |                | bias(es) (such as publication bias across                             |      |
| 40 |                | studies, selective reporting within studies)                          |      |
| 41 |                |                                                                       |      |
| 42 |                |                                                                       |      |
| 43 |                |                                                                       |      |
| 44 |                |                                                                       |      |
| 45 |                |                                                                       |      |
| 46 | Confidence in  | <a href="#">#17</a> Describe how the strength of the body of          | 10   |
| 47 |                | evidence will be assessed (such as GRADE)                             |      |
| 48 | cumulative     |                                                                       |      |
| 49 | evidence       |                                                                       |      |
| 50 |                |                                                                       |      |
| 51 |                |                                                                       |      |
| 52 |                |                                                                       |      |
| 53 |                |                                                                       |      |
| 54 | Notes:         |                                                                       |      |
| 55 |                |                                                                       |      |
| 56 |                |                                                                       |      |
| 57 |                |                                                                       |      |
| 58 |                |                                                                       |      |
| 59 |                |                                                                       |      |
| 60 |                |                                                                       |      |

- 1 • 2: PROSPERO registration number CRD42020152837 The PRISMA-P elaboration and  
2 explanation paper is distributed under the terms of the Creative Commons Attribution License  
3 CC-BY. This checklist was completed on 18. January 2022 using <https://www.goodreports.org/>, a  
4  
5 tool made by the [EQUATOR Network](#) in collaboration with [Penelope.ai](#)  
6  
7  
8  
9  
10  
11  
12  
13  
14  
15  
16  
17  
18  
19  
20  
21  
22  
23  
24  
25  
26  
27  
28  
29  
30  
31  
32  
33  
34  
35  
36  
37  
38  
39  
40  
41  
42  
43  
44  
45  
46  
47  
48  
49  
50  
51  
52  
53  
54  
55  
56  
57  
58  
59  
60
