# Supplementary material for: Effect of stress management based on cognitive–behavioural therapy on nurses as a universal prevention in the workplace: a systematic review and meta-analysis protocol
Source: PubMed Central journal article supplement — BMJ Open. 2022 Sep 19;12(9):e062516. doi: 10.1136/bmjopen-2022-062516 (PMC9486364; doi:10.1136/bmjopen-2022-062516), 2022-09-19
Supplement: bmjopen-2022-062516supp001.pdf [file bmjopen-2022-062516supp001.pdf]

## Supplementary File 1.

## Search terms for PubMed

(nurse[tiab] OR nurses[tiab] OR nursing[tw] OR nursery[tw] OR “health personnel”[tw] OR “health care personnel”[tw] OR “healthcare personnel”[tw] OR “health care worker”[tw] OR “health care workers”[tw] OR “healthcare worker”[tw] OR “healthcare workers”[tw] OR “health worker”[tw] OR “health workers”[tw] OR “health professional”[tw] OR “health professionals”[tw] OR “health care professional”[tw] OR “health care professionals”[tw] OR “healthcare professional”[tw] OR “healthcare professionals”[tw] OR “medical care personnel”[tw] OR “health staff”[tw] OR “health staffs”[tw] OR “healthcare staff”[tw] OR “healthcare staffs”[tw] OR “health care staff”[tw] OR “health care staffs”[tw]) AND (cognitive[tw] OR behavio\*[tw] OR mindfulness[tw] OR CBT[tw] OR ACT[tw]) AND (burnout[tw] OR anxiety[tw] OR anxious\*[tw] OR depression[tw] OR depress\*[tw] OR “mental health”[tw] OR stress\*[tw] OR distress[tw]) AND (“randomized controlled trial”[pt] OR (randomized[tiab] AND controlled[tiab] AND trial[tiab]))
