# Supplementary material for: Effect of stress management based on cognitive–behavioural therapy on nurses as a universal prevention in the workplace: a systematic review and meta-analysis protocol
Source: PubMed Central journal article supplement — BMJ Open. 2022 Sep 19;12(9):e062516. doi: 10.1136/bmjopen-2022-062516 (PMC9486364; doi:10.1136/bmjopen-2022-062516), 2022-09-19
Supplement: bmjopen-2022-062516supp003.pdf [file bmjopen-2022-062516supp003.pdf]

## Supplementary File 3. Standardized data extraction form

---

| ID | No | Title | Author | Source<br>(Database,<br>Journal,<br>Year) | Country<br>where the<br>study was<br>conducted | Number of<br>participants<br>included in<br>the analysis | Sampling<br>framework | Participants' demographic<br>characteristics<br>(imean age, sex<br>proportions, years of<br>nursing experience, and<br>employment status) | Number of<br>participants<br>who were<br>excluded or<br>lost to follow-<br>up | Contents of the<br>intervention program | Control condition<br>(no intervention,<br>waiting-list<br>control, or other) | Outcome<br>variables | Length<br>of follow-up | Sufficient data<br>(the number of participants in each group (N),<br>mean differences (MD) between groups, and<br>SD for outcomes) |
|----|----|-------|--------|-------------------------------------------|------------------------------------------------|----------------------------------------------------------|-----------------------|-------------------------------------------------------------------------------------------------------------------------------------------|-------------------------------------------------------------------------------|-----------------------------------------|------------------------------------------------------------------------------|----------------------|------------------------|------------------------------------------------------------------------------------------------------------------------------------|
|    |    |       |        |                                           |                                                |                                                          |                       |                                                                                                                                           |                                                                               |                                         |                                                                              |                      |                        |                                                                                                                                    |
|    |    |       |        |                                           |                                                |                                                          |                       |                                                                                                                                           |                                                                               |                                         |                                                                              |                      |                        |                                                                                                                                    |
|    |    |       |        |                                           |                                                |                                                          |                       |                                                                                                                                           |                                                                               |                                         |                                                                              |                      |                        |                                                                                                                                    |
|    |    |       |        |                                           |                                                |                                                          |                       |                                                                                                                                           |                                                                               |                                         |                                                                              |                      |                        |                                                                                                                                    |

---
